# Supplementary material
Source: PubMed Central journal article supplement (PMC6688777)
Supplement: NIHMS1535566-supplement-2.pdf [file NIHMS1535566-supplement-2.pdf]

# Upregulation of the Autophagy Adaptor p62/SQSTM1 Prolongs Health and Lifespan in Middle-Aged *Drosophila*

## Graphical Abstract

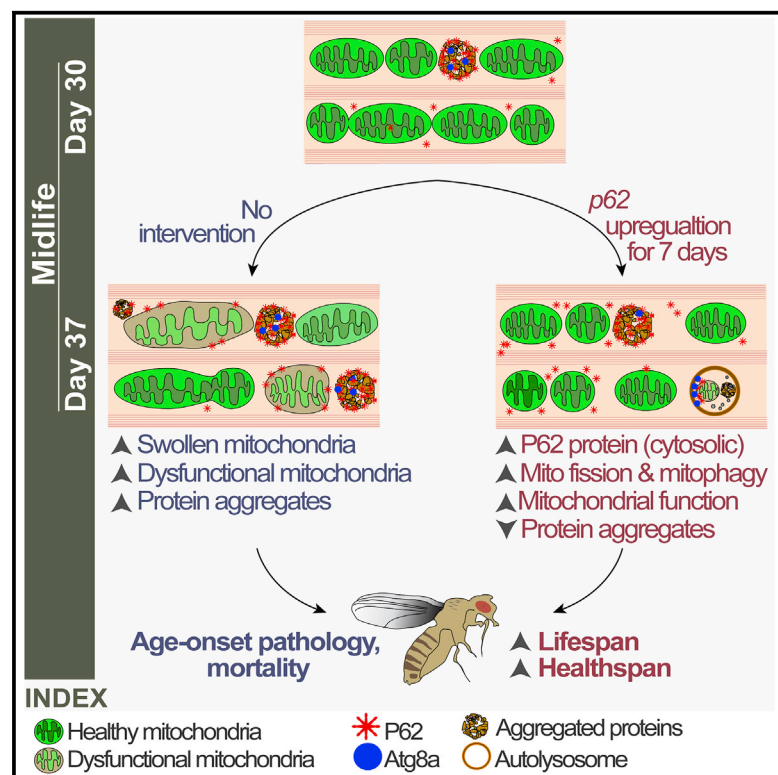

## Authors

Ricardo Aparicio, Anil Rana,  
David W. Walker

## Correspondence

davidwalker@ucla.edu

## In Brief

Autophagy has been proposed to promote longevity in diverse species, yet the underlying molecular mechanisms remain poorly understood. Using *Drosophila*, Aparicio et al. show that upregulating a prototypic autophagy receptor, p62/SQSTM1, from midlife onward slows aging and prolongs health span. Midlife p62 induction promotes mitochondrial fission and mitophagy to slow aging.

## Highlights

- Upregulating p62 from midlife onward prolongs fly lifespan and health span
- Midlife p62 induction improves proteostasis, in aged flies, via autophagy
- Midlife p62 induction promotes mitochondrial fission and mitophagy in aged flies
- Mitochondrial fission and autophagy are required for midlife p62-mediated longevity

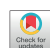

# Upregulation of the Autophagy Adaptor p62/SQSTM1 Prolongs Health and Lifespan in Middle-Aged *Drosophila*

Ricardo Aparicio,<sup>1,3</sup> Anil Rana,<sup>1,3</sup> and David W. Walker<sup>1,2,4,\*</sup><sup>1</sup>Department of Integrative Biology and Physiology, University of California, Los Angeles, Los Angeles, CA 90095, USA<sup>2</sup>Molecular Biology Institute, University of California, Los Angeles, Los Angeles, CA 90095, USA<sup>3</sup>These authors contributed equally<sup>4</sup>Lead Contact

\*Correspondence: davidwalker@ucla.edu

<https://doi.org/10.1016/j.celrep.2019.06.070>

## SUMMARY

Autophagy, a lysosomal degradation pathway, plays crucial roles in health and disease. p62/SQSTM1 (hereafter p62) is an autophagy adaptor protein that can shuttle ubiquitinated cargo for autophagic degradation. Here, we show that upregulating the *Drosophila* p62 homolog *ref(2)P/dp62*, starting in midlife, delays the onset of pathology and prolongs healthy lifespan. Midlife induction of *dp62* improves proteostasis, in aged flies, in an autophagy-dependent manner. Previous studies have reported that p62 plays a role in mediating the clearance of dysfunctional mitochondria via mitophagy. However, the causal relationships between p62 expression, mitochondrial homeostasis, and aging remain largely unexplored. We show that upregulating *dp62*, in midlife, promotes mitochondrial fission, facilitates mitophagy, and improves mitochondrial function in aged flies. Finally, we show that mitochondrial fission is required for the anti-aging effects of midlife *dp62* induction. Our findings indicate that p62 represents a potential therapeutic target to counteract aging and prolong health in aged mammals.

## INTRODUCTION

Loss of protein homeostasis (proteostasis) and mitochondrial dysfunction are two cellular hallmarks of aging, each of which has been proposed to contribute to age-related health decline (Kaushik and Cuervo, 2015; Sun et al., 2016). Therefore, identifying interventions that could improve proteostasis and/or mitochondrial function when targeted to aged animals could lead to treatments to forestall disease and promote healthy aging. Macroautophagy, hereafter autophagy, is a degradation pathway that plays key roles in development, tissue homeostasis, and disease pathogenesis (Levine and Kroemer, 2008). In this process, cellular materials (referred to as autophagic cargo) are sequestered by double-membrane vesicles known as autophagosomes (APs) and delivered to the lysosome for degradation (Feng et al., 2014). In recent years, autophagy, and more

specifically a requirement for autophagy-related genes, has been implicated in genetic, dietary, and pharmacological interventions that extend lifespan in model organisms (Hansen et al., 2018). These findings support the idea that autophagy induction plays a causal role in these longevity paradigms. In addition, constitutively increasing basal levels of autophagy, by directly manipulating autophagy-related genes, has been reported to promote longevity in diverse species including mice (Fernández et al., 2018; Hansen et al., 2018; Lapierre et al., 2013; Pyo et al., 2013; Simonsen et al., 2008; Ulgherait et al., 2014). Importantly, however, while autophagy induction is generally considered to be cytoprotective, it has also been linked to cell death and disease pathogenesis (Levine and Kroemer, 2008; Liu and Levine, 2015). Therefore, it is likely that in certain physiological contexts, autophagy can contribute to pathophysiology and, thereby, limit lifespan. Indeed, recent work has shown that inhibition of autophagy-related genes, in post-reproductive *C. elegans*, can prolong lifespan and health span, leading to the proposal that autophagy switches to a harmful role in aged animals (Wilhelm et al., 2017). Hence, fundamental questions remain unanswered regarding the mechanism(s) by which age-related modulation of autophagy impacts organismal health and lifespan. Critically, there is a relative lack of understanding of how to modulate autophagy in aged animals to improve tissue homeostasis and prolong health.

Autophagy receptors designate substrate specificity through the recognition of specific cargo, including protein aggregates (aggrephagy), mitochondria (mitophagy), and pathogens (xenophagy) (Stolz et al., 2014). Critically, however, an understanding of the role of autophagy cargo receptors in aging and lifespan determination remains elusive. p62 (also known as Sequestosome 1) is a prototypic autophagy adaptor that possesses a C-terminal ubiquitin-binding domain and a short LC3-interacting region responsible for LC3/ATG8 interaction, allowing recruitment of ubiquitinated cargo into nascent APs (Johansen and Lamark, 2011; Pankiv et al., 2007). Studies in *Drosophila melanogaster* and mice have shown that p62 is required for the aggregation of ubiquitinated proteins and their autophagic clearance (Komatsu et al., 2007; Nezis et al., 2008). In addition, p62 has been shown to play a role in the PINK1/Parkin pathway of mitophagy (Ashrafi and Schwarz, 2013). A key step in mitophagy involves the recruitment of Parkin, an E3 ubiquitin ligase, from the cytosol to a dysfunctional mitochondrion (Narendra et al., 2008).

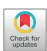

Once there, Parkin ubiquitinates outer mitochondrial membrane proteins and induces mitophagy (Ashrafi and Schwarz, 2013). p62 accumulates on damaged mitochondria and can recognize Parkin-mediated, poly-ubiquitinated chains (Geisler et al., 2010). The question of whether p62 is required for mitophagy remains controversial with some studies in mammalian cells reporting that p62 is required for Parkin-mediated mitophagy (Ding et al., 2010; Geisler et al., 2010; Lee et al., 2010), but not others (Narendra et al., 2010). Consistent with a key role for p62 in mitophagy, *Refractory to Sigma P, ref(2)P*, the single *Drosophila* ortholog of p62 has been shown to play an essential role in promoting mitophagy (de Castro et al., 2013). Studies in both flies and mice have shown that genetic inactivation of p62 leads to early-onset mitochondrial dysfunction, neurodegeneration, and reduced lifespan (de Castro et al., 2013; Kwon et al., 2012; Ramesh Babu et al., 2008). However, the consequences of increasing p62 expression, in aging animals, on mitochondrial homeostasis, proteotoxicity, and organismal health are not known.

The proposed roles of p62 in the autophagic clearance of protein aggregates (aggrephagy) and dysfunctional mitochondria (mitophagy) led us to examine whether p62 could modulate tissue and/or organismal aging. To do so, we examined the impact of upregulation of the *Drosophila* p62 homolog *ref(2)P/dp62* (de Castro et al., 2013) at different stages of adulthood. Importantly, we show that midlife induction of *dp62* improves markers of health and prolongs lifespan. Short-term, midlife *dp62* induction improves proteostasis in aged muscle. Critically, the ability of midlife *dp62* induction to improve proteostasis and prolong lifespan is dependent upon autophagy-related genes. In addition, midlife *dp62* induction promotes mitophagy and improves markers of mitochondrial function in aged flies. The process of mitophagy is intimately linked to mitochondrial fission/fusion processes (Ashrafi and Schwarz, 2013; Twig and Shirihai, 2011). Here, we show that inhibiting mitochondrial fission, via expression of a dominant-negative Dynamin-related protein 1 (Drp1) transgene, impairs *dp62*-mediated improvements in mitochondrial function and longevity. Furthermore, knockdown of *parkin* abrogates *dp62*-mediated longevity. Together, our findings indicate that activating *dp62* expression, in midlife, is an effective approach to improve proteostasis and mitochondrial function and, thereby, prolong healthy lifespan.

## RESULTS

### Midlife *dp62* Induction Prolongs Lifespan and Health Span

Previous studies have reported a decline in *p62* mRNA levels in aged mice (Kwon et al., 2012) and in the brains of Alzheimer's disease patients (Du et al., 2009). To better understand the relationship between p62 expression and aging, we examined mRNA levels of the *Drosophila* ortholog of *p62*, *ref(2)P* (hereafter *dp62*), in aging flies. qPCR analysis showed that transcript levels of *dp62* at first increase early in adult life and then later on, after midlife, show a sharp decrease in expression (Figure 1A). To determine whether *dp62* can modulate organismal aging, we examined the impact of *dp62* upregulation on *Drosophila* lifespan. To do so, we used Gene-Switch driver lines to activate a *UAS-dp62* transgene created by de Castro et al. (2013). Using

the Gene-Switch system eliminates genetic background effects as all flies share the same genetic background and only differ with respect to the presence of the inducing agent (RU486) or diluent (ethanol) in the food (Osterwalder et al., 2001). Using ubiquitous *daughterless (da)GS>UAS-dp62* flies, we showed that *dp62* transcript and protein levels can be significantly upregulated in midlife upon short-term RU486 treatment (Figures 1B, 1C, and S1A). Next, we set out to examine the impact of temporally defined upregulation of *dp62* on fly lifespan. Upregulation of *dp62* in early adulthood (days 0–30) had no significant impact on longevity (Figure S1B). However, upregulating *dp62* from midlife (day 30) onward significantly extended lifespan in female flies in multiple trials (Figures 1D, S1C, and S1D). Interestingly, however, we failed to observe *dp62*-mediated lifespan extension in male flies (Figure S1E). Using an independently generated *UAS-dp62* transgene (Chang and Neufeld, 2009), we confirmed that midlife *dp62* induction prolongs female lifespan (Figures S1F and S1G). Because ubiquitous, midlife *dp62* induction in female flies resulted in the most pronounced extension of lifespan, this paradigm was used in all further experiments.

It is important to determine whether interventions that prolong lifespan also extend health span, the functional and disease-free period of life. Hence, we examined a number of markers of health span and behavior in middle-aged (day 37) *daGS>UAS-dp62* flies following 7 days of *dp62* induction from day 30 onward. As a reduction in food intake can modulate lifespan, we tested whether midlife *dp62* induction affects feeding behavior. Using a capillary feeding assay (Ja et al., 2007), we observed no significant change in feeding behavior upon midlife *dp62* induction (Figure 1E). Midlife *dp62* induction had no effect on the spontaneous physical activity of aged flies (Figures S1H and S1I). Critically, however, short-term midlife *dp62* induction produced a significant improvement in an endurance exercise paradigm (Figure 1F). A major goal of geroscience is to identify interventions that can forestall age-onset pathology. Intestinal barrier dysfunction is an evolutionarily conserved pathophysiological marker of aging, which is linked to systemic metabolic defects and mortality (Dambroise et al., 2016; Rera et al., 2012). To determine whether *dp62* induction can impact intestinal aging, we examined intestinal integrity during aging via the “Smurf assay” (Rera et al., 2011, 2012). Remarkably, we observed a delay in the onset of intestinal barrier dysfunction upon *dp62* induction from day 30 onward (Figure 1G). Importantly, RU486 treatment had no effect on *dp62* levels, lifespan, feeding behavior, the endurance paradigm, or the onset of intestinal barrier dysfunction in control flies (Figures S1J–S1O). Collectively, these data demonstrate that midlife *dp62* induction improves health span, delays the onset of pathology linked to aging, and increases lifespan.

### Midlife *dp62* Induction Improves Proteostasis in Aged Flies

The accumulation of damaged and/or aggregated proteins, due to an age-related decline in proteostasis, contributes to aging and multiple age-related diseases (Kaushik and Cuervo, 2015). To determine whether midlife *dp62* induction could impact proteostasis in aged animals, we characterized the accumulation of ubiquitinated protein aggregates in aged flight muscles using immunofluorescence (IF) microscopy. Aged *Drosophila* flight

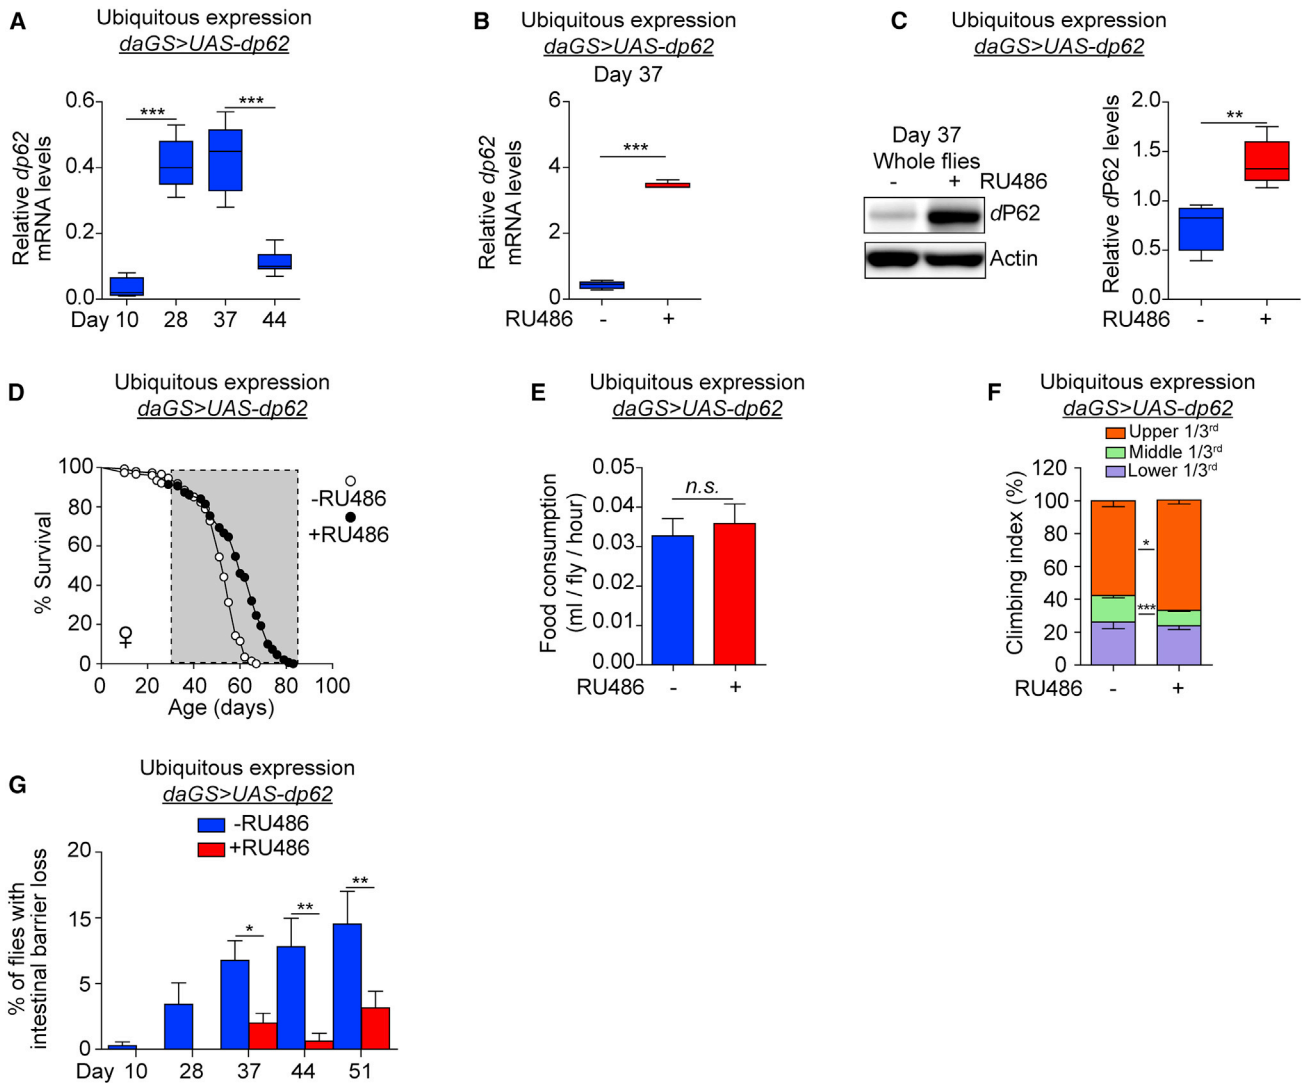

**Figure 1. Midlife *dp62* Induction Extends Lifespan and Health Span**

(A) qPCR analyses of *dp62* mRNA levels on days 10, 28, 37, and 44 in *daGS>UAS-dp62* females without RU486.  $n = 5$  biological replicates with 3 flies per replicate; \*\*\* $p < 0.001$ ; one-way ANOVA/Bonferroni's multiple-comparisons test.

(B) qPCR analyses of *dp62* mRNA levels on day 37 in *daGS>UAS-dp62* females with or without RU486 mediated transgene induction for 7 days (day 30 to day 37).  $n = 5$  biological replicates with 3 flies per replicate; \*\*\* $p < 0.001$ ; unpaired t test.

(C) Western blot detection and quantification of dP62 levels in day 37 *daGS>UAS-dp62* females with or without RU486-mediated transgene induction for 7 days (day 30 to day 37).  $n = 5$  biological replicates with 5 flies per replicate. \*\* $p < 0.01$ ; unpaired t test.

(D) Survival curves of *daGS>UAS-dp62* females with or without RU486-mediated transgene induction from day 30 onward. The shaded area indicates the duration of *dp62* induction.  $p < 0.0001$ ; log-rank test;  $n > 147$  flies.

(E) Capillary feeding assay (CAFE) of 37-day-old *daGS>UAS-dp62* females with or without RU486-mediated transgene induction from day 30 to day 37.  $n = 10$  vials of 10 flies per condition;  $p > 0.05$  and is non-significant (n.s.); unpaired t test.

(F) Climbing index as a measure of endurance of 37-day-old *daGS>UAS-dp62* females with or without RU486-mediated transgene induction from day 30 to day 37.  $n = 3$  biological replicates with 100 flies per replicate; \*\*\* $p < 0.001$  and \* $p < 0.05$ ; unpaired t test.

(G) Intestinal integrity during aging of *daGS>UAS-dp62* females with or without RU486-mediated transgene induction since midlife (day 30) onward.  $n = 120$  flies on day 10; \*\* $p < 0.01$ , \* $p < 0.05$ ; one-way ANOVA/Bonferroni's multiple-comparisons test. RU486 was provided in the media at a concentration of 25  $\mu\text{g/mL}$ . Error bars represent SEM.

muscles accumulate ubiquitinated protein aggregates consistent with a loss of proteostasis (Figures 2A–2C or 2A''–2C''; quantification in Figure 2E). Remarkably, midlife induction of *dp62* for a week, starting at day 30, resulted in reduced levels

of aggregated proteins in aged muscles (compare Figure 2C with Figure 2D or Figure 2C'' with Figure 2D''; quantification in Figure 2E). In a complementary approach, we examined the levels of ubiquitinated proteins by western blotting upon

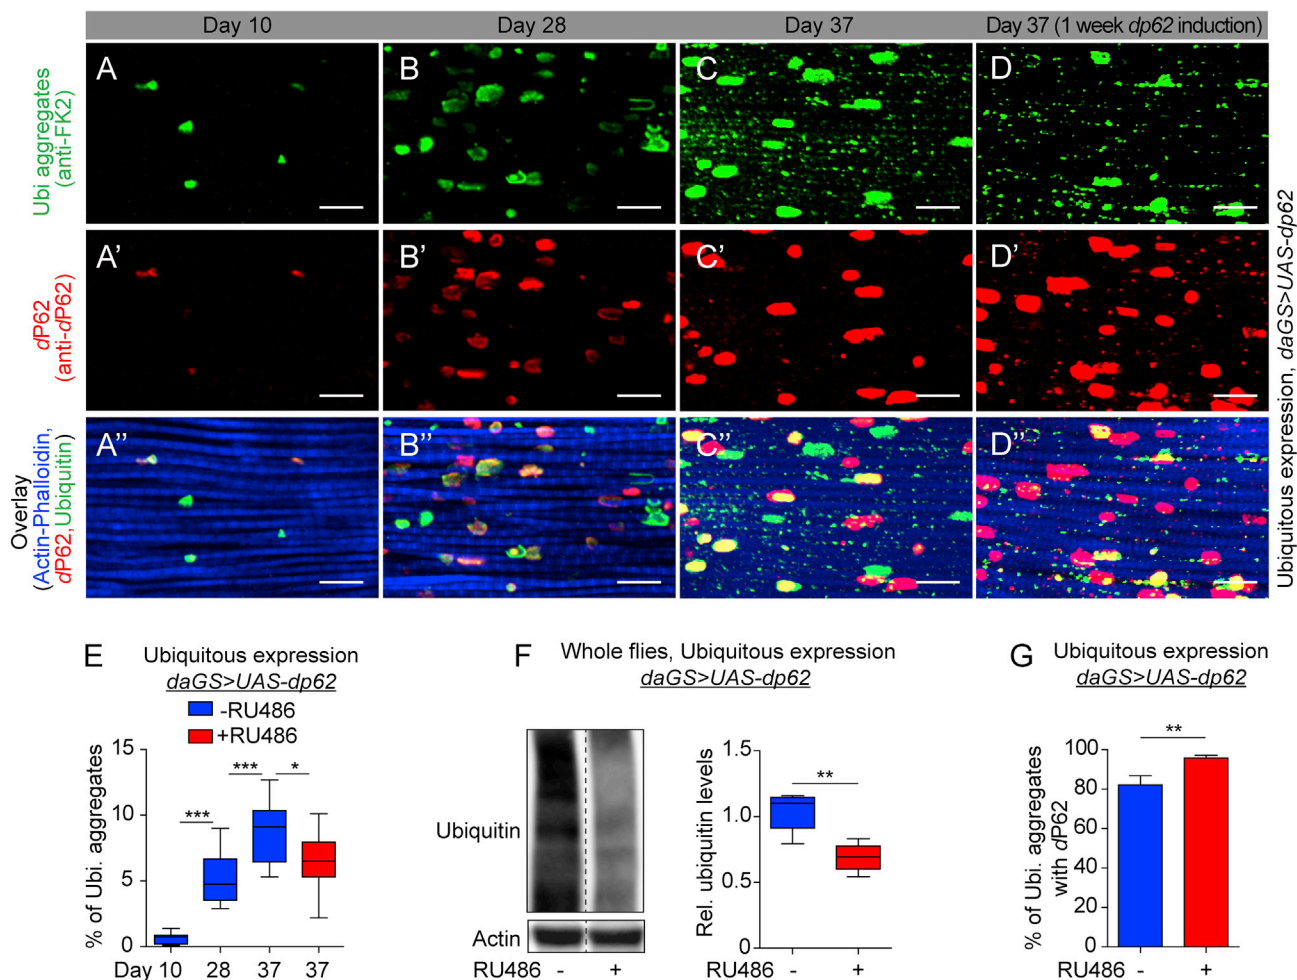

**Figure 2. Midlife *dp62* Induction Improves Proteostasis in Aged Flies**

(A–D'') Immunostaining of indirect flight muscles from day 10 (A, A', and A''), 28 (B, B', and B''), and 37 *daGS>UAS-dp62* females with (D, D', and D'') or without (C, C', and C'') RU486-mediated transgene induction from day 30 to day 37, showing polyubiquitinated aggregates (green channel, anti-FK2); *dP62* (red channel, anti-*dP62*); and muscles (blue channel stained with phalloidin/F-Actin). Scale bar is 10  $\mu$ m.

(E) Quantification of polyubiquitin aggregates in muscle as shown in (A)–(D).  $n > 8$  flies; \*\*\* $p < 0.001$  and \* $p < 0.1$ ; one-way ANOVA/Bonferroni's multiple-comparisons test.

(F) Western blot detection and densitometry of total ubiquitin-conjugated proteins from day 37 *daGS>UAS-dp62* females with or without RU486-mediated transgene induction from day 30 to day 37.  $n = 5$  replicates with 5 flies per replicate; \*\* $p < 0.01$ ; unpaired t test.

(G) Quantification of colocalization of *dP62* with polyubiquitinated aggregates (anti-FK2) as shown in (C'') and (D'').  $n > 8$  flies; \*\* $p < 0.01$ ; unpaired t test.

RU486 was provided in the media at a concentration of 25  $\mu$ g/mL. Error bars represent SEM.

short-term, midlife *dp62* induction. Consistent with the IF data, we observed that midlife *dp62* induced flies display reduced levels of ubiquitinated proteins in the whole flies and detergent-soluble fraction (Figures 2F and S2A). Since p62 is itself an autophagy substrate, impaired autophagy is associated with increased levels of p62 protein in mammals and *Drosophila* (Klionsky et al., 2016). Indeed, we observed that flight muscles from middle-aged *Drosophila* show elevated *dP62* levels (Figures 2A'–2C'); quantification in Figures S2B and S2C). Interestingly, midlife induction of *dp62* for a week from day 30 onward resulted in increased co-localization of *dP62* and polyubiquitinated aggregates (compare Figure 2C'' with Figure 2D''); quantification in Figure 2G). Importantly, feeding RU486 to control flies

did not alter the accumulation of ubiquitinated proteins during aging (Figures S2D–S2H), the levels of *dP62* (Figure S2I), or co-localization of *dP62* with the polyubiquitinated aggregates (Figure S2J).

### Midlife *dp62* Induction Requires Autophagy for Improved Proteostasis and Longevity

Numerous studies have reported a decline in autophagic activity in tissues from aged animals (Hansen et al., 2018). Although an age-related decline in p62 transcript levels have been reported (Kwon et al., 2012), the relationship between p62 expression and autophagy in aged animals is not understood. Endogenous LC3/Atg8 levels are commonly used as steady-state autophagy

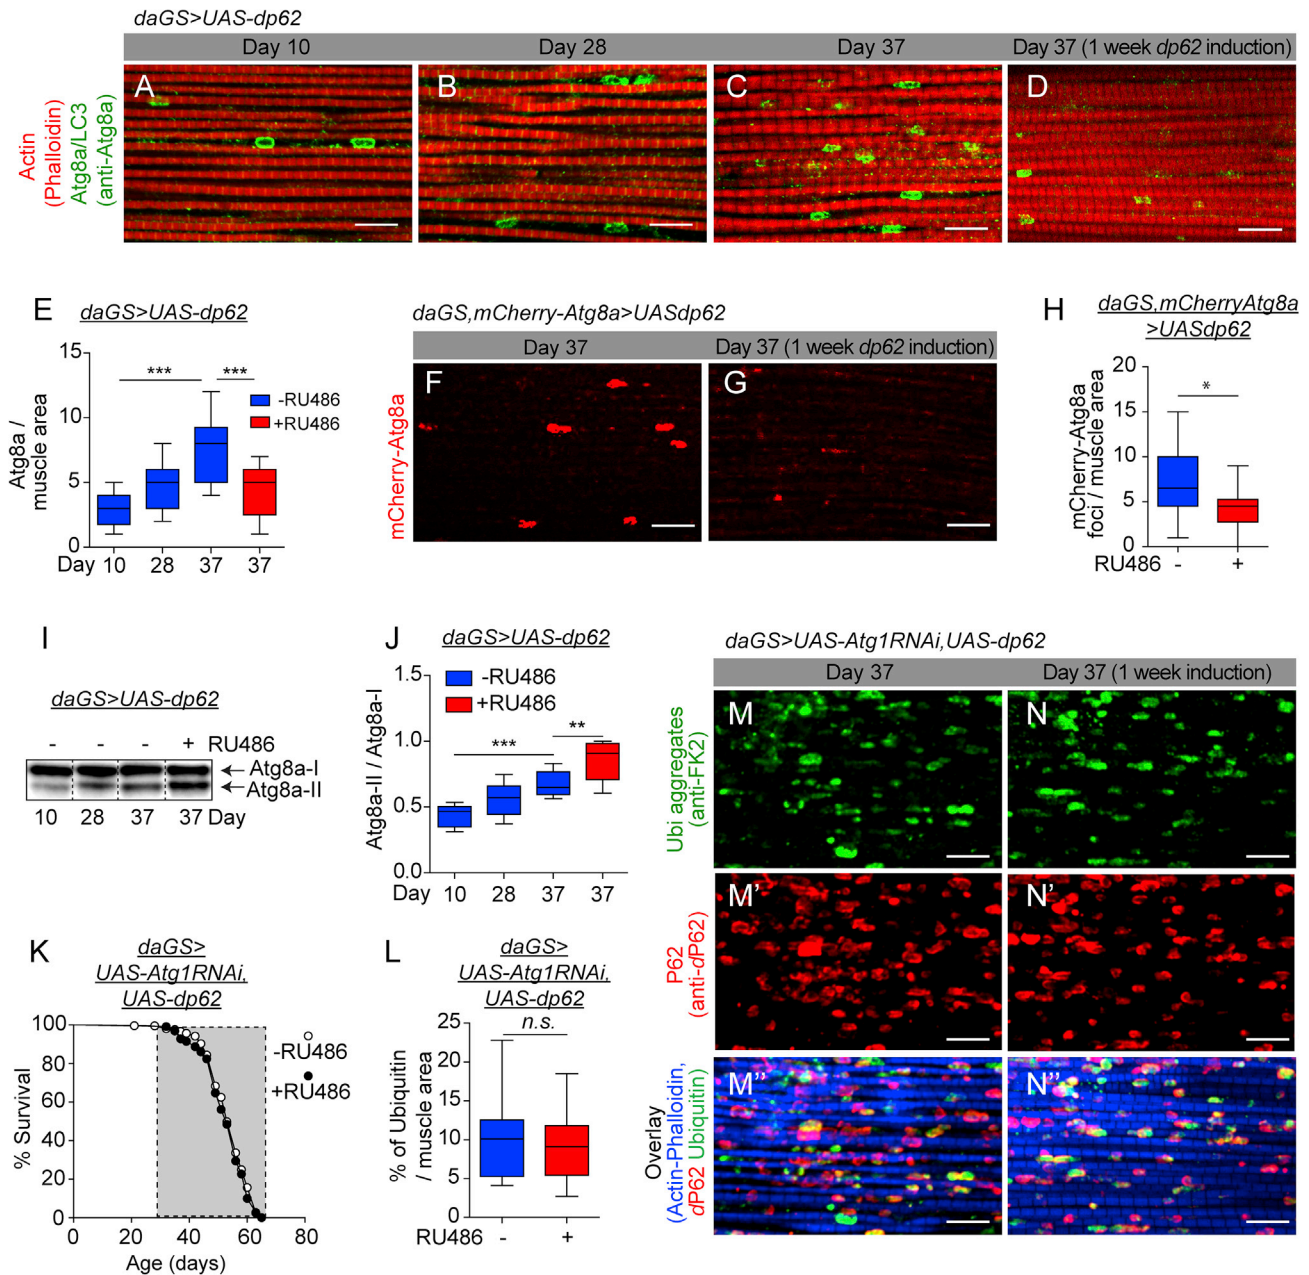

markers to allow visualization of autophagosomes (APs) (Klionsky et al., 2016). A recent study in *C. elegans*, using a fluorescently tagged LGG-1 (a *C. elegans* ortholog of Atg8), reported an age-related increase in AP numbers, reflective of a decline in autophagic activity (Chang et al., 2017). To explore the interplay between midlife *dp62* induction and autophagy, we examined the levels of endogenous ATG8a in aging flight muscles using IF microscopy. Consistent with findings in worms (Chang et al., 2017), we observed a striking increase in ATG8a levels in aged (37-day-old) muscle (Figures 3A–3C; quantification in Figure 3E). Using transmission electron microscopy coupled with immunogold labeling, we verified that the Atg8a antibody used above for IF can label APs and autolysosomes (ALs); double-membrane structures enclosing cellular materials (Figures S3A and S3B). Interestingly, short-term, midlife *dp62* induction (day 30–37) resulted in a significant decrease in ATG8a levels in aged muscle (compare Figure 3C with Figure 3D; quantification in Figure 3E). In a complementary approach, we used a transgenic reporter line (mCherry-Atg8a; Denton et al., 2012) to assess the effect of short term, midlife *dp62* induction (day 30–37) on AP/AL levels in aged muscles. Consistent with the IF data, midlife *dp62* induction (day 30–37) resulted in a significant decrease in mCherry-Atg8a levels in the aged muscles (Figures 3F and 3G; quantification in Figure 3H). qPCR analysis revealed that this decrease in the ATG8a protein levels was not accompanied by a change in *Atg8a* mRNA levels (Figure S3F). Importantly, RU486 treatment had no effect on the ATG8a levels in control flies (Figures S3G and S3H; quantification in Figure S3I).

LC3/ATG8 can be conjugated to phosphatidylethanolamine (PE) with the non-lipidated and lipidated forms referred to as ATG8/LC3-I and ATG8/LC3-II, respectively (Klionsky et al., 2016). Increased levels of PE-modified Atg8/LC3 (ATG8/LC3-II) can reflect the induction of autophagic sequestration (Klionsky et al., 2016). Short-term, midlife *dp62* induction (day 30–37) resulted in a greater ratio of ATG8a-II to ATG8a-I (Figures 3I and S3J; quantification in 3J). In addition, given the interconnection between the lysosome system and autophagy, we examined endogenous levels of the lysosome marker Lamp1 (lysosome-associated membrane protein 1) and detected an overall increase in Lamp1 levels in response to short-term, midlife *dp62* induction (Figures S3C and S3D; quantification in Figure S3E). One interpretation of these combined data is that midlife *dp62* induction stimulates autophagic activity.

To seek evidence of a causal role for autophagy in midlife-*dp62*-mediated proteostasis benefits and longevity, we set out to directly manipulate various autophagy-related genes. More specifically, we inhibited multiple autophagy-related genes by RNAi from midlife onward in flies with increased *dp62* and compared survivorship to flies with increased *dp62* alone. We observed that induced RNAi of *Atg1*, *Atg2*, *Atg5*, or *Atg13* from midlife suppressed the lifespan extension associated with *dp62* induction (Figures 3K and S3K–S3Q). Moreover, induction of RNAi of these autophagy genes from midlife had no major impact on lifespan in

control flies (Figures S4A–S4D). These results demonstrate that midlife *dp62*-mediated lifespan extension requires functional autophagy-related genes. *Atg1*, a Ser/Thr protein kinase involved in the initiation of AP formation (Feng et al., 2014), was selected for further studies. More specifically, using *daGS>UAS-Atg1RNAi;UAS-dp62* flies, we verified that RNAi of *Atg1* had no effect on the *dp62* induction (Figure S4E). Next, we set out to determine whether autophagy is required for *dP62*-mediated improvements in proteostasis in aged animals. Using *daGS>UAS-Atg1RNAi;UAS-dp62* flies, we examined the accumulation of polyubiquitinated proteins in aged flight muscles using IF microscopy. Interestingly, midlife RNAi of *Atg1* from day 30 onward suppressed the *dp62*-mediated reduction in protein aggregates in aged muscle (compare Figures 3M and 3N with 2C and 2D, or Figures 3M' and 3N' with 2C' and 2D'; quantification of Figures 3M and 3N in Figure 3L). Induced RNAi of *Atg1* had no effect on the increase in *dP62* levels in aged animals (Figures 3M' and 3N'; quantification in Figure S4F). RNAi of *Atg1* alone had no effect on the polyubiquitin aggregates levels or *dP62* levels (Figures S4G and S4H, and S4I and S4J; quantifications in Figures S4K and S4L). Overall, our data indicate that the prolongevity and enhanced proteostasis effects of midlife induction of *dp62* are dependent upon the autophagy pathway.

### Midlife *dp62* Induction Facilitates Mitophagy and Improves Mitochondrial Function

*dp62* has been proposed to function in the mitophagy pathway (Ashrafi and Schwarz, 2013), but the relationships between *p62*, mitophagy, and aging are not known. Here, we set out to examine the impact of short-term, midlife *dp62* induction on mitochondrial homeostasis in aged flight muscle. In recent years, studies in diverse organisms suggest that mitochondrial dynamics (fission and fusion) and mitophagy are closely related (Ashrafi and Schwarz, 2013; Twig and Shirihai, 2011). Indeed, mitochondrial fission is required for mitophagy in yeast and mammalian cells (Mao et al., 2013; Rambold et al., 2011; Twig et al., 2008; Twig and Shirihai, 2011), leading to the model that the fragmentation of mitochondria facilitates their engulfment by APs. Hence, we utilized IF microscopy to examine the impact of *dp62* induction on mitochondrial morphology in aged muscle. Upon *dp62* midlife induction for 7 days (day 30–37), we observed that mitochondrial morphology was more circular and less elongated as compared to controls suggesting an increase in mitochondrial fission/decrease in fusion (Figures 4A and 4B; quantification in Figure 4C). Recent work has shown that directly promoting mitochondrial fission in aged *Drosophila* flight muscle can facilitate mitophagy and improves mitochondrial function (Rana et al., 2017). Hence, we set out to first examine the impact of midlife *dp62* induction on mitochondrial function. We examined mitochondrial membrane potential using the potentiometric dye tetramethylrhodamine, ethyl ester (TMRE). Importantly, we observed that midlife induction (from day 30 to day 37) of *dp62* leads to a significant increase in TMRE fluorescence in aged

(M–M' and N–N') Immunostaining of indirect flight muscles from day 37 *daGS>UAS Atg1RNAi; UAS-dp62* females with (N, N', and N'') or without (M, M', and M'') RU486-mediated transgene induction from day 30 to day 37, showing polyubiquitinated aggregates (green channel, anti-FK2); *dP62* protein aggregates (red channel, anti-*dP62*) and muscles (blue channel, stained with phalloidin/F-actin). Scale bar is 10  $\mu$ m. RU486 was provided in the media at a concentration of 25  $\mu$ g/mL. Error bars represent SEM.

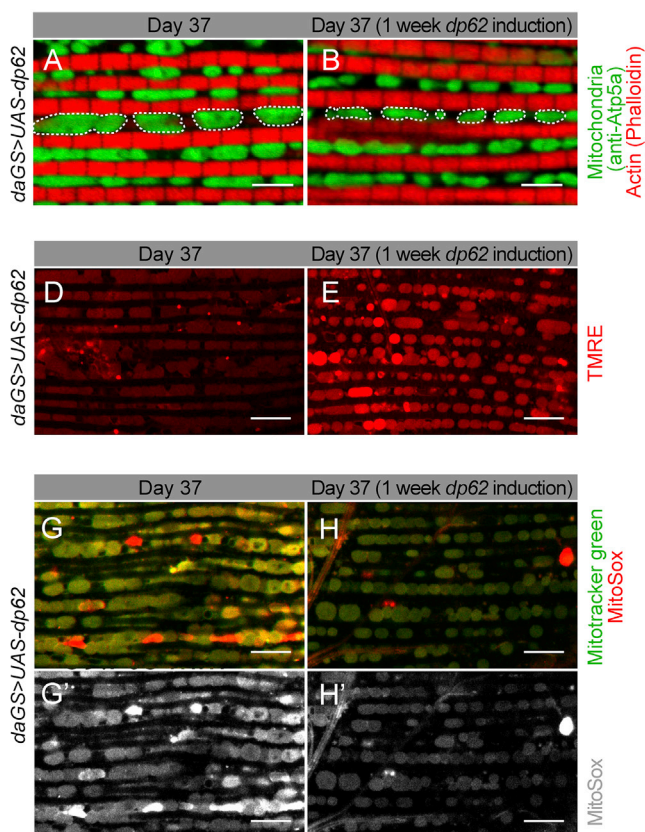

**Figure 4. Midlife *dp62* Induction Improves Mitochondrial Function**

(A and B) Immunostaining of indirect flight muscles from day 37 *daGS>UAS-dp62* females with (B) or without (A) RU486-mediated transgene induction from day 30 to day 37, showing mitochondrial morphology (green channel, anti-ATP5a); muscles (red channel, stained with phalloidin/F-actin). Scale bar is 5  $\mu$ m.

(C) Quantification of mitochondrial area in muscle as shown in (A) and (B).  $n = 8$  flies; \*\* $p < 0.01$ ; unpaired t test.

(D and E) Staining of indirect flight muscles from day 37 *daGS>UAS-dp62* females with (E) or without (D) RU486-mediated transgene induction from day 30 to day 37 showing TMRE fluorescence. Scale bar is 10  $\mu$ m.

(F) Quantification of mitochondrial membrane potential measured by TMRE staining as shown in (D) and (E).  $n > 15$  flies; \*\* $p < 0.01$ ; unpaired t test.

(G–H') Staining of indirect flight muscles from 37-day-old *daGS>UAS-dp62* females with (H and H') or without (G and G') RU486-mediated transgene induction from day 30 to day 37, showing mitochondria (green channel, Mitotracker green staining) and levels of superoxide radicals (red channel, staining with MitoSOX reagent). Scale bar is 10  $\mu$ m.

(I) Quantification of free superoxide radicals as shown in (G') and (H');  $n = 14$  biological replicates; \* $p < 0.05$ ; unpaired t test.

RU486 was provided in the media at a concentration of 25  $\mu$ g/mL. Error bars represent SEM.

flight muscle (Figures 4D and 4E; quantification in Figure 4F). Next, as an additional marker of mitochondrial health and function, we set out to determine the impact of short-term, midlife *dp62* induction on mitochondrial reactive oxygen species (ROS) levels. Upon midlife induction of *dp62* (from day 30 to day 37), we observed reduced mitochondrial ROS levels in day 37 aged flight muscles as compared to controls (Figures 4G and 4H, and 4G' and 4H'; quantification in Figure 4I). Importantly, RU486 treatment had no effect on mitochondrial size (Figures S5A–S5C), mitochondrial activity (Figures S5D–S5F), or ROS levels in the control flies (Figures S5G–S5I). In recent years, mitohormesis has been shown to promote longevity through mechanisms that may involve elevated ROS levels and induction of mitochondrial unfolded protein response (UPR<sup>mt</sup>) (Yun and Finkel, 2014). However, we failed to detect an induction of UPR<sup>mt</sup> genes upon midlife *dp62* induction (Figure S5J). These data indicate that midlife *dp62* induction does not promote beneficial effects via mitohormesis.

Next, we examined additional markers of mitochondrial homeostasis in midlife *dp62* induced flies. Mitophagy induction might promote selective turnover of dysfunctional mitochondria or mitochondrial components, thereby resulting in a decrease in mitochondrial content. Indeed, midlife induction of *dp62* for a short term (day 30–37) resulted in lower mitochondrial DNA levels in aged flight muscles (Figures 5A and 5B; quantification in Figure 5C). Importantly, RU486 treatment had no effect on the mitochondria DNA content in control flies (Figures S6A–S6C). To

further test the idea that midlife *dp62* induction facilitates mitophagy, we set out to examine co-localization of an autophagy marker with mitochondria. Midlife *dp62* induction for 7 days (day 30–37) resulted in a significant increase in ATG8a/LC3 levels in the mitochondrial fraction (Figure 5D). As an increase in P62 levels is linked to impaired autophagy (Klionsky et al., 2016), the recent finding that there is a striking accumulation of *dP62* co-localized with mitochondria in midlife is consistent with a decline in mitophagy in aged flies (Rana et al., 2017). Short-term, midlife *dp62* induction (day 30–37) resulted in reduced *dP62* levels in the mitochondrial fraction from aged flies (Figure 5E).

To further characterize the impact of midlife *dp62* induction, we used a recently characterized mitophagy reporter line, a tandem GFP-mCherry fusion protein targeted to the outer mitochondrial membrane, called mito-QC (Lee et al., 2018). This system exploits the pH-sensitive properties of GFP to enable the differential labeling of mitochondria in the acidic microenvironment of the lysosome as a readout of mitophagy (McWilliams et al., 2016). More specifically, we analyzed the expression pattern of mito-QC from midlife onward with or without *dp62* induction (day 30–37 or day 30–44). In this experiment, appearance of punctate mCherry-only foci (mitolysosomes) is quantified as an index of mitophagy induction. Remarkably, midlife induction of *dp62*, starting at day 30, resulted in increased levels of mitolysosomes (mCherry-only foci) in aged brains (Figures 5F–5L). Similarly, midlife *dp62* induction increased the numbers of mitolysosomes (mCherry-only foci) in intestinal cells (Figures S6D–S6J).



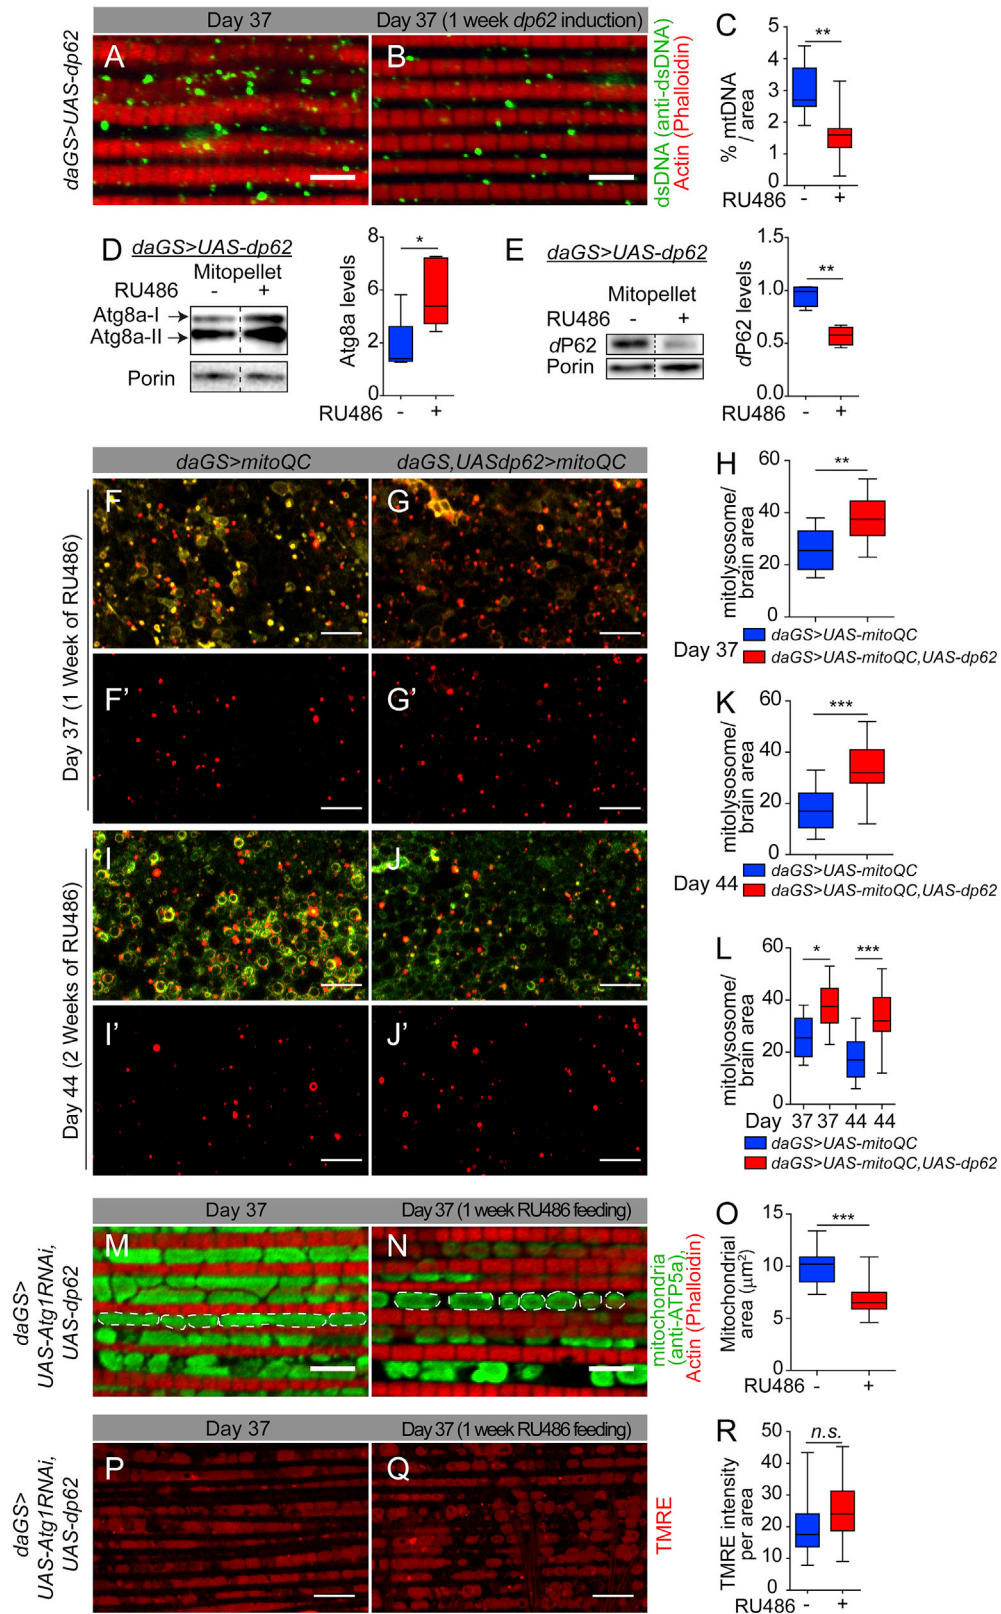

(legend on next page)

Next, we set out to determine whether autophagy is required for *dp62*-mediated improvements in mitochondrial function in middle-aged flies. More specifically, we inhibited *Atg1* by RNAi from midlife onward in flies with increased *dp62* and analyzed mitochondrial morphology and function. Interestingly, we found that *Atg1* is not required for *dp62*-mediated mitochondrial fission (Figures 5M and 5N; quantification in Figure 5O). Importantly, however, we found that induced RNAi of *Atg1* in midlife suppressed the improvement in TMRE fluorescence associated with midlife *dp62* induction (Figures 5P and 5Q; quantification in Figure 5R). Taken together, these findings indicate that short-term induction of *dp62* in midlife facilitates mitophagy leading to improved mitochondrial function in aged animals.

### Midlife *dp62* Induction Requires Mitochondrial Fission for Mitochondrial Function and Lifespan Benefits

There is an emerging understanding that mitochondrial fission is a prerequisite for mitophagy (Cho et al., 2019; Rana et al., 2017; Twig and Shirihai, 2011). Hence, we set out to better understand the role of mitochondrial fission and mitophagy in *dp62*-mediated improvements in mitochondrial function and longevity. To do so, we directly manipulated Drp1, a dynamin-related protein that promotes mitochondrial fission (Hoppins et al., 2007). More specifically, we inhibited mitochondrial fission, by inducing a dominant-negative Drp1 (*Drp1<sup>K38A</sup>*) transgene (Park et al., 2009), from midlife onward in flies with increased *dp62* levels and examined the impact on mitochondrial morphology, mitochondrial function, and compared survivorship to flies with increased *dp62* alone. We confirmed that inducing dominant-negative Drp1 (*Drp1<sup>K38A</sup>*) from midlife onward in flies with increased *dp62* levels (Figure S7A) prevented an increase in mitochondrial fission (Figures 6A and 6B; quantification in Figure 6C). Next, these flies were examined for mitochondrial membrane potential using the potentiometric dye TMRE. Flies with induced *Drp1<sup>K38A</sup>* from midlife onward along with increased *dp62* levels failed to show any improvement in TMRE fluorescence (Figures 6D and 6E; quantification in Figure 6F) as compared to when *dp62* alone was induced (Figures 4D–4F).

Next, we set out to determine whether mitochondrial fission is required for *dp62*-mediated longevity. Critically, we found that inhibiting mitochondrial fission in flies with midlife *dp62* induction resulted in reduced lifespan (Figures 6G and S7B). In addition, we find that induced RNAi of *parkin* suppressed the lifespan extension associated with midlife *dp62* induction (Figures 6H, S7C, and S7D). Moreover, RNAi of *parkin* from midlife did not shorten lifespan in control flies (Figure S7E). Taken together, these results indicate that the anti-aging and prolongevity effects of midlife *dp62* induction depend upon mitochondrial fission-mediated mitophagy.

## DISCUSSION

Numerous lines of evidence indicate that aging is linked to alterations in the activity of the autophagy pathway (Hansen et al., 2018). However, the underlying mechanisms that lead to these changes and the causal relationships between altered autophagic activity and age-related health decline remain subject to speculation. Critically, the question of whether increasing the expression of autophagy-related genes in aged animals can slow tissue aging and/or promote longevity remains largely unexplored. In this study, we used the fruit fly *Drosophila* as a model organism to address the question of whether p62, a prototypic autophagy cargo receptor, can modulate tissue and/or organismal aging. Using an inducible gene expression system, we show that upregulation of *dp62* from midlife onward leads to a significant increase in fly lifespan. Furthermore, we show that induction of *dp62* in middle-aged animals improves several markers of organismal health and delays age-onset pathology. Induction of *dp62* in young flies did not produce a prolongevity effect, indicating that *dp62* expression levels are not limiting for health in early life. Our findings reveal that p62 represents a therapeutic target to counteract aging and, thereby, prolong health span in aged animals. It is interesting to note that an 8-fold induction of *dp62* mRNA levels was associated with lifespan extension.

As P62 is a multifunctional protein that serves as a signaling hub for a myriad of cellular processes including amino acid sensing,

### Figure 5. Midlife *dp62* Induction Facilitates Mitophagy

(A and B) Immunostaining of indirect flight muscles from day 37 *daGS>UAS-dp62* females with (B) or without (A) RU486-mediated transgene induction from day 30 to day 37, showing dsDNA (green channel, anti-dsDNA); muscles (red channel, stained with phalloidin/F-actin). Scale bar is 5  $\mu$ m.

(C) Quantification of mitochondrial DNA in muscle as shown in (A) and (B).  $n = 8$  flies; \*\* $p < 0.01$ ; unpaired t test.

(D and E) Western blot detection and densitometry of Atg8a (D) and *dP62* (E) levels in isolated mitochondria from day 37 *daGS>UAS-dp62* females with or without RU486-mediated transgene induction from day 30 to day 37.  $n = 5$  replicates, 5 flies per replicate; \* $p < 0.05$ ; \*\* $p < 0.01$ ; unpaired t test.

(F–J) *mito-QC* of brains from day 37 (F, G, and F', G') and day 44 (I, J, and I', J') females. Genotypes analyzed were *daGS>UAS-dp62*, *UAS-mito-QC*, and *daGS>UAS-mito-QC* females with RU486-mediated transgene induction from day 30 to day 37 or from day 30 to day 44, showing merged image of GFP and mCherry (F, G, and I, J) and punctate mCherry-only foci (resulting from merged image where GFP has been quenched; mitolysosomes) (F', G', I', and J'). Scale bar is 10  $\mu$ m.

(H, K, and L) Quantification of mitolysosomes in brains as shown in (F') and (G'), and (I') and (J') at day 37 (H), day 44 (K), and at day 37 and 44 (L).  $n > 10$  flies; \*\* $p < 0.01$ ; \*\*\* $p < 0.001$ ; unpaired t test (H–K). \*\*\* $p < 0.001$  and \* $p < 0.05$ ; one-way ANOVA/Bonferroni's multiple-comparisons test (L).

(M and N) Immunostaining of indirect flight muscles from day 37 *daGS>UAS-Atg1RNAi,UAS-dp62* females with (N) or without (M) RU486-mediated transgene induction from day 30 to day 37, showing mitochondrial morphology (green channel, anti-ATP5a); muscles (red channel, stained with phalloidin/F-actin). Scale bar is 5  $\mu$ m.

(O) Quantification of mitochondrial area in muscle as shown in (M) and (N).  $n = 9$  flies; \*\*\* $p < 0.001$ ; unpaired t test.

(P and Q) Staining of indirect flight muscles from day 37 *daGS>UAS-Atg1RNAi,UAS-dp62* females with (Q) or without (P) RU486-mediated transgene induction from day 30 to day 37 showing TMRE fluorescence. Scale bar is 10  $\mu$ m.

(R) Quantification of mitochondrial membrane potential measured by TMRE staining as shown in (P) and (Q).  $n > 10$  flies;  $p > 0.05$  and is non-significant (n.s.); unpaired t test.

RU486 was provided in the media at a concentration of 25  $\mu$ g/mL. Error bars represent SEM.

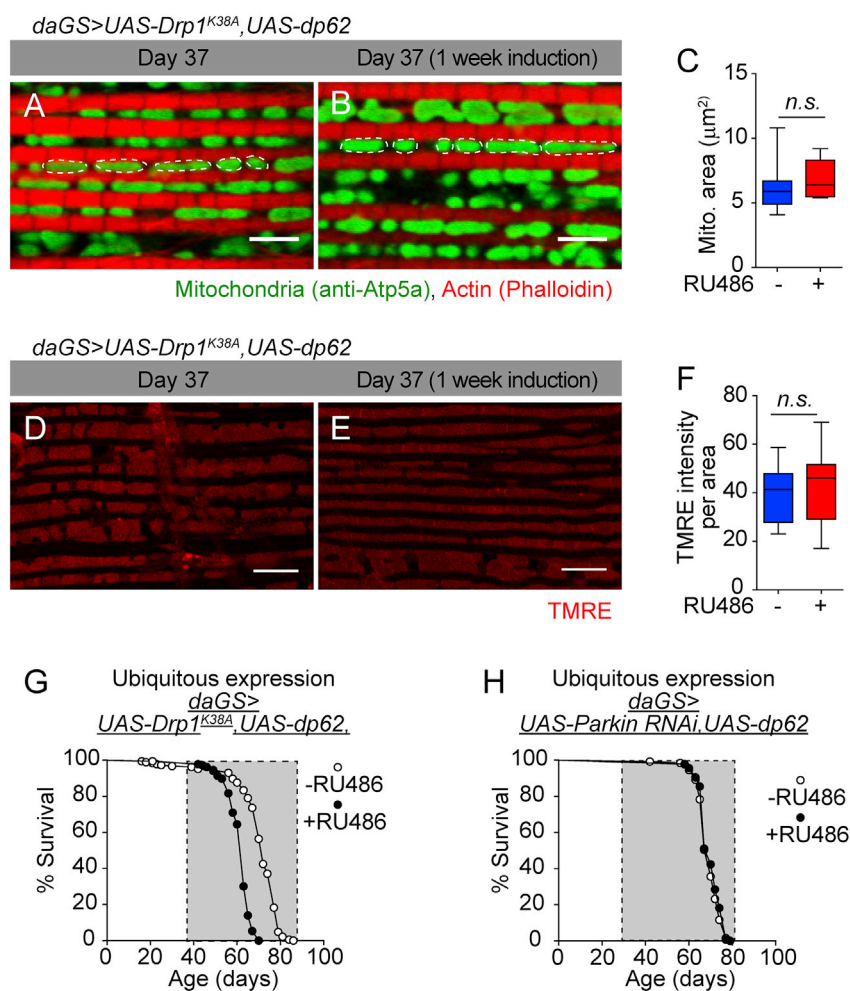

**Figure 6. Mitochondrial Fission Is Required for Beneficial Effects of Midlife *dp62* Induction**

(A and B) Immunostaining of indirect flight muscles from day 37 *daGS>UAS-dp62, UAS-Drp1<sup>K38A</sup>* females with (B) or without (A) RU486-mediated transgene induction from day 30 to day 37, showing mitochondrial morphology (green channel, anti-ATP5a) and muscles (red channel, stained with phalloidin/F-actin). Scale bar is 5 μm.

(C) Quantification of mitochondrial area in muscle as shown in (A) and (B). n > 11 flies; p > 0.05 and is n.s.; unpaired t test.

(D and E) Staining of indirect flight muscles from day 37 *daGS>UAS-dp62, UAS-Drp1<sup>K38A</sup>* females with (E) or without (D) RU486-mediated transgene induction from day 30 to day 37 showing TMRE fluorescence. Scale bar is 10 μm.

(F) Quantification of mitochondrial membrane potential measured by TMRE staining as shown in (D) and (E). n = 13 flies; p > 0.05 and is non-significant (n.s.); unpaired t test.

(G) Survival curves of *daGS>UAS-dp62, UAS-Drp1<sup>K38A</sup>* females with or without RU486-mediated transgene induction from day 30 onward. The shaded area indicates the duration of *dp62* and *Drp1<sup>K38A</sup>* induction. p < 0.0001, log-rank test; n > 186 flies.

(H) Survival curves of *daGS>UAS-dp62, UAS-Parkin RNAi* females with or without RU486-mediated transgene induction from day 30 onward. The shaded area indicates the duration of *dp62* and *Parkin RNAi* induction. p = 0.183 and is non-significant (n.s.), log-rank test; n > 125 flies.

RU486 was provided in the media at a concentration of 25 μg/mL. Error bars represent SEM.

immunity, and the oxidative response (Avila et al., 2002; Bangham et al., 2007; Katsuragi et al., 2015), there exist several potential candidate mechanisms that could underlie the beneficial effects of midlife *dp62* induction. Critically, we show that the anti-aging effects of midlife *dp62* induction, both at the tissue and organismal level, are dependent upon autophagy-related genes. More specifically, we show that midlife *dp62* induction reduces proteotoxicity in aged muscles and promotes longevity in an *Atg1*-dependent manner. Moreover, we find that midlife *dp62* induction leads to a shift toward mitochondrial fission and improves mitochondrial function in an *Atg1*-dependent fashion. To better understand the importance of mitochondrial fission in *dp62*-mediated longevity, we set out to simultaneously inhibit mitochondrial fission and upregulate *dp62* in midlife. Consistent with the idea that mitochondrial fission is important in facilitating mitophagy in aged animals (D'Amico et al., 2019; Rana et al., 2013, 2017), we find that inhibiting mitochondrial fission abrogates the beneficial effects of midlife *dp62* induction on mitochondrial function and longevity. Studies in yeast have shown that upon mitophagy induction, Dnm1 (yeast Drp1 ortholog) is recruited to the degrading mitochondria via the scaffold protein Atg11 to induce fission

(Mao et al., 2013). Future work could focus on elucidating the molecular mechanisms by which increased *dp62* expression promotes mitochondrial fission in aged animals. In addition, we show that *dp62*-mediated longevity requires *parkin*, a key component of the mitophagy pathway (Ashrafi and Schwarz, 2013). Our findings, therefore, indicate that the selective clearance of mitochondria, via mitophagy, is key to midlife *dp62*-mediated longevity.

The autophagy pathway represents an attractive therapeutic target to promote healthy aging in humans. However, the question of when and how to manipulate autophagy in aging mammals, in order to prolong health, is not understood. A recent study reported that a gain-of-function mutation in a core autophagy gene, *Becn1*, can extend mammalian lifespan (Fernández et al., 2018). However, it is not clear whether targeting approaches of this kind to aged mammals can promote longevity. Recent findings, in *C. elegans*, have shown that inhibiting genes involved in early stages of autophagy in aged animals can prolong lifespan (Wilhelm et al., 2017). As a result, it has been proposed that dysfunctional autophagy in aged animals, linked to blockage of autophagy at a late stage, may contribute to age-

onset health decline (Wilhelm et al., 2017). Hence, it is possible that interventions that induce early stages of autophagy, including AP formation, may not promote health when targeted to aged animals. In contrast, our findings suggest that midlife up-regulation of the autophagy adaptor protein, p62, can promote the autophagic clearance of protein aggregates and mitochondria in aged animals. Hence, increasing p62 expression by pharmacological means, in midlife, may be an effective approach to prolong health span in mammals.

## STAR★METHODS

Detailed methods are provided in the online version of this paper and include the following:

- KEY RESOURCES TABLE
- LEAD CONTACT AND MATERIALS AVAILABILITY
- EXPERIMENTAL MODEL AND SUBJECT DETAILS
  - *Drosophila melanogaster*
  - Fly Stocks
  - Fly Husbandry and Lifespan Analysis
- METHOD DETAILS
  - Capillary Feeding Assay (CAFE Assay)
  - Spontaneous physical activity assay
  - Climbing activity
  - Intestinal barrier dysfunction (Smurf) assay
  - Immunostaining and Image analysis
  - Immunogold Labeling and Electron Microscopy
  - TMRE Staining
  - MitoSox staining
  - Mito-QC staining
  - Western Blot Assay
  - Mitochondria Purification
  - RNA extraction, cDNA synthesis and Quantitative Real-Time PCR
- QUANTIFICATION AND STATISTICAL ANALYSIS

## SUPPLEMENTAL INFORMATION

Supplemental Information can be found online at <https://doi.org/10.1016/j.celrep.2019.06.070>.

## ACKNOWLEDGMENTS

We thank L. Miguel Martins and Alex Whitworth (University of Cambridge), Vienna *Drosophila* RNAi Center, and the *Drosophila* Stock Center (Bloomington) for fly stocks; Mary C. Onglatco and Lyndon C. Bui for help with fly work; and Chunni Zhu for help with immunogold labelling and electron microscopy. Stocks obtained from the Bloomington *Drosophila* Stock Center (NIH P40OD018537) were used in this study. This work was supported by NIH grants (R01AG037514, R01AG049157, and R01AG040288) to D.W.W. This research was conducted while D.W.W. was a Julie Martin Mid-Career Awardee in Aging Research supported by The Ellison Medical Foundation and AFAR.

## AUTHOR CONTRIBUTIONS

R.A., A.R., and D.W.W. conceived and designed the experiments. R.A. and A.R. performed the experiments. R.A., A.R., and D.W.W. analyzed the data. R.A., A.R., and D.W.W. wrote the paper.

## DECLARATION OF INTERESTS

The authors declare no competing interests.

Received: September 30, 2018

Revised: April 21, 2019

Accepted: June 19, 2019

Published: July 23, 2019

## REFERENCES

- Ashrafi, G., and Schwarz, T.L. (2013). The pathways of mitophagy for quality control and clearance of mitochondria. *Cell Death Differ.* *20*, 31–42.
- Avila, A., Silverman, N., Diaz-Meco, M.T., and Moscat, J. (2002). The *Drosophila* atypical protein kinase C-ref(2)p complex constitutes a conserved module for signaling in the toll pathway. *Mol. Cell. Biol.* *22*, 8787–8795.
- Bangham, J., Obbard, D.J., Kim, K.W., Haddrill, P.R., and Jiggins, F.M. (2007). The age and evolution of an antiviral resistance mutation in *Drosophila melanogaster*. *Proc. Biol. Sci.* *274*, 2027–2034.
- Chang, Y.Y., and Neufeld, T.P. (2009). An Atg1/Atg13 complex with multiple roles in TOR-mediated autophagy regulation. *Mol. Biol. Cell* *20*, 2004–2014.
- Chang, J.T., Kumsta, C., Hellman, A.B., Adams, L.M., and Hansen, M. (2017). Spatiotemporal regulation of autophagy during *Caenorhabditis elegans* aging. *eLife* *6*, e18459.
- Cho, H.M., Ryu, J.R., Jo, Y., Seo, T.W., Choi, Y.N., Kim, J.H., Chung, J.M., Cho, B., Kang, H.C., Yu, S.W., et al. (2019). Drp1-Zip1 interaction regulates mitochondrial quality surveillance system. *Mol. Cell* *73*, 364–376.e8.
- D’Amico, D., Mottis, A., Potenza, F., Sorrentino, V., Li, H., Romani, M., Lemos, V., Schoonjans, K., Zamboni, N., Knott, G., et al. (2019). The RNA-binding protein PUM2 impairs mitochondrial dynamics and mitophagy during aging. *Mol. Cell* *73*, 775–787.e10.
- Dambrose, E., Monnier, L., Ruisheng, L., Aguilaniu, H., Joly, J.S., Tricoire, H., and Rera, M. (2016). Two phases of aging separated by the Smurf transition as a public path to death. *Sci. Rep.* *6*, 23523.
- de Castro, I.P., Costa, A.C., Celardo, I., Tufi, R., Dinsdale, D., Loh, S.H., and Martins, L.M. (2013). *Drosophila ref(2)P* is required for the parkin-mediated suppression of mitochondrial dysfunction in pink1 mutants. *Cell Death Dis.* *4*, e873.
- Denton, D., Chang, T.K., Nicolson, S., Shrivage, B., Simin, R., Baehrecke, E.H., and Kumar, S. (2012). Relationship between growth arrest and autophagy in midgut programmed cell death in *Drosophila*. *Cell Death Differ.* *19*, 1299–1307.
- Ding, W.X., Ni, H.M., Li, M., Liao, Y., Chen, X., Stolz, D.B., Dorn, G.W., 2nd, and Yin, X.M. (2010). Nix is critical to two distinct phases of mitophagy, reactive oxygen species-mediated autophagy induction and Parkin-ubiquitin-p62-mediated mitochondrial priming. *J. Biol. Chem.* *285*, 27879–27890.
- Du, Y., Wooten, M.C., Gearing, M., and Wooten, M.W. (2009). Age-associated oxidative damage to the p62 promoter: implications for Alzheimer disease. *Free Radic. Biol. Med.* *46*, 492–501.
- Feng, Y., He, D., Yao, Z., and Klionsky, D.J. (2014). The machinery of macroautophagy. *Cell Res.* *24*, 24–41.
- Fernández, A.F., Sebti, S., Wei, Y., Zou, Z., Shi, M., McMillan, K.L., He, C., Ting, T., Liu, Y., Chiang, W.C., et al. (2018). Disruption of the beclin 1-BCL2 autophagy regulatory complex promotes longevity in mice. *Nature* *558*, 136–140.
- Geisler, S., Holmström, K.M., Skujat, D., Fiesel, F.C., Rothfuss, O.C., Kahle, P.J., and Springer, W. (2010). PINK1/Parkin-mediated mitophagy is dependent on VDAC1 and p62/SQSTM1. *Nat. Cell Biol.* *12*, 119–131.
- Hansen, M., Rubinsztein, D.C., and Walker, D.W. (2018). Autophagy as a promoter of longevity: insights from model organisms. *Nat. Rev. Mol. Cell Biol.* *19*, 579–593.
- Hoppins, S., Lackner, L., and Nunnari, J. (2007). The machines that divide and fuse mitochondria. *Annu. Rev. Biochem.* *76*, 751–780.

- Ja, W.W., Carvalho, G.B., Mak, E.M., de la Rosa, N.N., Fang, A.Y., Liong, J.C., Brummel, T., and Benzer, S. (2007). Prandiology of *Drosophila* and the CAFE assay. *Proc. Natl. Acad. Sci. USA* *104*, 8253–8256.
- Johansen, T., and Lamark, T. (2011). Selective autophagy mediated by autophagic adapter proteins. *Autophagy* *7*, 279–296.
- Katsuragi, Y., Ichimura, Y., and Komatsu, M. (2015). p62/SQSTM1 functions as a signaling hub and an autophagy adaptor. *FEBS J.* *282*, 4672–4678.
- Kaushik, S., and Cuervo, A.M. (2015). Proteostasis and aging. *Nat. Med.* *21*, 1406–1415.
- Klionsky, D.J., Abdelmohsen, K., Abe, A., Abedin, M.J., Abeliovich, H., Acevedo Arozena, A., Adachi, H., Adams, C.M., Adams, P.D., Adeli, K., et al. (2016). Guidelines for the use and interpretation of assays for monitoring autophagy (3rd edition). *Autophagy* *12*, 1–222.
- Komatsu, M., Waguri, S., Koike, M., Sou, Y.S., Ueno, T., Hara, T., Mizushima, N., Iwata, J., Ezaki, J., Murata, S., et al. (2007). Homeostatic levels of p62 control cytoplasmic inclusion body formation in autophagy-deficient mice. *Cell* *131*, 1149–1163.
- Kwon, J., Han, E., Bui, C.B., Shin, W., Lee, J., Lee, S., Choi, Y.B., Lee, A.H., Lee, K.H., Park, C., et al. (2012). Assurance of mitochondrial integrity and mammalian longevity by the p62-Keap1-Nrf2-Nqo1 cascade. *EMBO Rep.* *13*, 150–156.
- Lapierre, L.R., De Magalhaes Filho, C.D., McQuary, P.R., Chu, C.C., Visvikis, O., Chang, J.T., Gelino, S., Ong, B., Davis, A.E., Irazoqui, J.E., et al. (2013). The TFEB orthologue HLH-30 regulates autophagy and modulates longevity in *Caenorhabditis elegans*. *Nat. Commun.* *4*, 2267.
- Lee, J.Y., Nagano, Y., Taylor, J.P., Lim, K.L., and Yao, T.P. (2010). Disease-causing mutations in parkin impair mitochondrial ubiquitination, aggregation, and HDAC6-dependent mitophagy. *J. Cell Biol.* *189*, 671–679.
- Lee, J.J., Sanchez-Martinez, A., Zarate, A.M., Benincá, C., Mayor, U., Clague, M.J., and Whitworth, A.J. (2018). Basal mitophagy is widespread in *Drosophila* but minimally affected by loss of Pink1 or parkin. *J. Cell Biol.* *217*, 1613–1622.
- Levine, B., and Kroemer, G. (2008). Autophagy in the pathogenesis of disease. *Cell* *132*, 27–42.
- Liu, Y., and Levine, B. (2015). Autosis and autophagic cell death: the dark side of autophagy. *Cell Death Differ.* *22*, 367–376.
- Mao, K., Wang, K., Liu, X., and Klionsky, D.J. (2013). The scaffold protein Atg11 recruits fission machinery to drive selective mitochondria degradation by autophagy. *Dev. Cell* *26*, 9–18.
- McWilliams, T.G., Prescott, A.R., Allen, G.F., Tamjar, J., Munson, M.J., Thomson, C., Muqit, M.M., and Ganley, I.G. (2016). mito-QC illuminates mitophagy and mitochondrial architecture in vivo. *J. Cell Biol.* *214*, 333–345.
- Narendra, D., Tanaka, A., Suen, D.F., and Youle, R.J. (2008). Parkin is recruited selectively to impaired mitochondria and promotes their autophagy. *J. Cell Biol.* *183*, 795–803.
- Narendra, D., Kane, L.A., Hauser, D.N., Fearnley, I.M., and Youle, R.J. (2010). p62/SQSTM1 is required for Parkin-induced mitochondrial clustering but not mitophagy; VDAC1 is dispensable for both. *Autophagy* *6*, 1090–1106.
- Nezis, I.P., Simonsen, A., Sagona, A.P., Finley, K., Gaumer, S., Contamine, D., Rusten, T.E., Stenmark, H., and Brech, A. (2008). Ref(2)P, the *Drosophila melanogaster* homologue of mammalian p62, is required for the formation of protein aggregates in adult brain. *J. Cell Biol.* *180*, 1065–1071.
- Osterwalder, T., Yoon, K.S., White, B.H., and Keshishian, H. (2001). A conditional tissue-specific transgene expression system using inducible GAL4. *Proc. Natl. Acad. Sci. USA* *98*, 12596–12601.
- Pankiv, S., Clausen, T.H., Lamark, T., Brech, A., Bruun, J.A., Outzen, H., Øvervatn, A., Bjørkøy, G., and Johansen, T. (2007). p62/SQSTM1 binds directly to Atg8/LC3 to facilitate degradation of ubiquitinated protein aggregates by autophagy. *J. Biol. Chem.* *282*, 24131–24145.
- Park, J., Lee, G., and Chung, J. (2009). The PINK1-Parkin pathway is involved in the regulation of mitochondrial remodeling process. *Biochem. Biophys. Res. Commun.* *378*, 518–523.
- Pyo, J.O., Yoo, S.M., Ahn, H.H., Nah, J., Hong, S.H., Kam, T.I., Jung, S., and Jung, Y.K. (2013). Overexpression of Atg5 in mice activates autophagy and extends lifespan. *Nat. Commun.* *4*, 2300.
- Rambold, A.S., Kostelecky, B., Elia, N., and Lippincott-Schwartz, J. (2011). Tubular network formation protects mitochondria from autophagosomal degradation during nutrient starvation. *Proc. Natl. Acad. Sci. USA* *108*, 10190–10195.
- Ramesh Babu, J., Lamar Seibenhener, M., Peng, J., Strom, A.L., Kemppainen, R., Cox, N., Zhu, H., Wooten, M.C., Diaz-Meco, M.T., Moscat, J., and Wooten, M.W. (2008). Genetic inactivation of p62 leads to accumulation of hyperphosphorylated tau and neurodegeneration. *J. Neurochem.* *106*, 107–120.
- Rana, A., Rera, M., and Walker, D.W. (2013). Parkin overexpression during aging reduces proteotoxicity, alters mitochondrial dynamics, and extends lifespan. *Proc. Natl. Acad. Sci. USA* *110*, 8638–8643.
- Rana, A., Oliveira, M.P., Khamoui, A.V., Aparicio, R., Rera, M., Rossiter, H.B., and Walker, D.W. (2017). Promoting Drp1-mediated mitochondrial fission in midlife prolongs healthy lifespan of *Drosophila melanogaster*. *Nat. Commun.* *8*, 448.
- Rera, M., Bahadorani, S., Cho, J., Koehler, C.L., Ulgherait, M., Hur, J.H., Ansari, W.S., Lo, T., Jr., Jones, D.L., and Walker, D.W. (2011). Modulation of longevity and tissue homeostasis by the *Drosophila* PGC-1 homolog. *Cell Metab.* *14*, 623–634.
- Rera, M., Clark, R.I., and Walker, D.W. (2012). Intestinal barrier dysfunction links metabolic and inflammatory markers of aging to death in *Drosophila*. *Proc. Natl. Acad. Sci. USA* *109*, 21528–21533.
- Simonsen, A., Cumming, R.C., Brech, A., Isakson, P., Schubert, D.R., and Finley, K.D. (2008). Promoting basal levels of autophagy in the nervous system enhances longevity and oxidant resistance in adult *Drosophila*. *Autophagy* *4*, 176–184.
- Stolz, A., Ernst, A., and Dikic, I. (2014). Cargo recognition and trafficking in selective autophagy. *Nat. Cell Biol.* *16*, 495–501.
- Sun, N., Youle, R.J., and Finkel, T. (2016). The mitochondrial basis of aging. *Mol. Cell* *61*, 654–666.
- Twig, G., and Shirihai, O.S. (2011). The interplay between mitochondrial dynamics and mitophagy. *Antioxid. Redox Signal.* *14*, 1939–1951.
- Twig, G., Elorza, A., Molina, A.J., Mohamed, H., Wikstrom, J.D., Walzer, G., Stiles, L., Haigh, S.E., Katz, S., Las, G., et al. (2008). Fission and selective fusion govern mitochondrial segregation and elimination by autophagy. *EMBO J.* *27*, 433–446.
- Ulgherait, M., Rana, A., Rera, M., Graniel, J., and Walker, D.W. (2014). AMPK modulates tissue and organismal aging in a non-cell-autonomous manner. *Cell Rep.* *8*, 1767–1780.
- Wilhelm, T., Byrne, J., Medina, R., Kolundžić, E., Geisinger, J., Hajduskova, M., Tursun, B., and Riehly, H. (2017). Neuronal inhibition of the autophagy nucleation complex extends life span in post-reproductive *C. elegans*. *Genes Dev.* *31*, 1561–1572.
- Yun, J., and Finkel, T. (2014). Mitohormesis. *Cell Metab.* *19*, 757–766.

## STAR★METHODS

### KEY RESOURCES TABLE

| REAGENT or RESOURCE                                     | SOURCE                            | IDENTIFIER                       |
|---------------------------------------------------------|-----------------------------------|----------------------------------|
| <b>Antibodies</b>                                       |                                   |                                  |
| Mouse anti-mono- and polyubiquitinated conjugates (FK2) | Enzo Life Sciences                | Cat# BML-PW8810-0100             |
| Rabbit anti- <i>dP62</i>                                | <a href="#">Rana et al., 2017</a> | N/A                              |
| Rabbit anti-Atg8a                                       | <a href="#">Rana et al., 2017</a> | N/A                              |
| Mouse anti-ATP5a                                        | Abcam                             | Cat# ab14748; RRID: AB_301447    |
| Mouse anti-dsDNA                                        | Abcam                             | Cat# ab27156; RRID: AB_470907    |
| Rabbit anti-Lamp1                                       | Abcam                             | Cat# ab30687; RRID: AB_775973    |
| Mouse anti VDAC1/Porin                                  | Abcam                             | Cat# ab14734; RRID: AB_443084    |
| Rabbit anti-GABARAP+GABARAPL1+GABARAPL2                 | Abcam                             | Cat# ab109364; RRID: AB_10861928 |
| Mouse anti-ubiquitin (P4D1)                             | Cell Signaling                    | Cat# 3936; RRID: AB_331292       |
| Rabbit anti-HA Tag                                      | Cell Signaling                    | Cat# 3724; RRID: AB_1549585      |
| Rabbit anti-GFP                                         | Cell Signaling                    | Cat# 2956; RRID: AB_1196615      |
| Mouse anti-Actin-Peroxidase                             | Sigma-Aldrich                     | Cat# A3854; RRID: AB_262011      |
| Goat anti-Mouse IgG (H+L) Alexa Fluor 488               | Thermo Fisher Scientific          | Cat# A-11001; RRID: AB_2534069   |
| Goat anti-Rabbit IgG (H+L) Alexa Fluor 488              | Thermo Fisher Scientific          | Cat# A-11008; RRID: AB_143165    |
| Goat anti-Mouse IgG (H+L) Alexa Fluor 568               | Thermo Fisher Scientific          | Cat# A-11031; RRID: AB_144696    |
| Goat anti-Rabbit IgG (H+L) Alexa Fluor 568              | Thermo Fisher Scientific          | Cat# A-11036; RRID: AB_143011    |
| Goat anti-Mouse IgG (H+L) Alexa Fluor 647               | Thermo Fisher Scientific          | Cat# A-32728; RRID: AB_2633277   |
| Goat anti-Rabbit IgG (H+L) Alexa Fluor 647              | Thermo Fisher Scientific          | Cat# A-32733; RRID: AB_2633282   |
| Alexa Fluor™ 488 Phalloidin                             | Thermo Fisher Scientific          | Cat# A12379; RRID: AB_2315147    |
| Alexa Fluor™ 568 Phalloidin                             | Thermo Fisher Scientific          | Cat# A12380                      |
| Alexa Fluor™ 647 Phalloidin                             | Thermo Fisher Scientific          | Cat# A22287; RRID: AB_2620155    |
| Goat anti-Mouse (Whole molecule) peroxidase             | Sigma-Aldrich                     | Cat# A4416; RRID: AB_258167      |
| Goat anti-Rabbit (Whole molecule) peroxidase            | Sigma-Aldrich                     | Cat# A6154; RRID: AB_258284      |
| <b>Chemicals, Peptides and Recombinant Proteins</b>     |                                   |                                  |
| Agar                                                    | Genesee Scientific                | Cat# 66-104                      |
| Yeast                                                   | MP Biomedicals                    | 290331225                        |
| Sucrose                                                 | Genesee Scientific                | Cat# 62-112                      |
| Dextrose                                                | Genesee Scientific                | Cat# 62-113                      |
| Cornmeal                                                | Genesee Scientific                | Cat# 62-100                      |
| Propionic Acid                                          | Sigma Aldrich                     | Cat# P1386                       |
| Phosphoric Acid                                         | Sigma Aldrich                     | Cat# 438081                      |
| Tegosept (Methylparaben)                                | Genesee Scientific                | Cat# 20-259                      |
| Mifepristone (RU486)                                    | Cayman Chemicals                  | Cat# 10006317                    |
| FD&C Blue Dye #1                                        | SPS Alfachem                      | N/A                              |
| Formaldehyde                                            | Sigma Aldrich                     | Cat# F1635                       |
| PBS (10X), pH 7.4                                       | Thermo Fisher Scientific          | Cat# 70011044                    |
| DL-Dithiothreitol                                       | Sigma Aldrich                     | Cat# 43815                       |
| NuPAGE LDS Sample Buffer (4X)                           | Thermo Fisher Scientific          | Cat# NP0008                      |
| TRIzol Reagent                                          | Thermo Fisher Scientific          | Cat# 15596018                    |
| Chloroform                                              | Sigma Aldrich                     | Cat# C2432                       |
| Bovine Serum Albumin                                    | Sigma Aldrich                     | Cat# A2153                       |

(Continued on next page)

**Continued**

| REAGENT or RESOURCE                                                           | SOURCE                                                       | IDENTIFIER       |
|-------------------------------------------------------------------------------|--------------------------------------------------------------|------------------|
| Triton X-100                                                                  | Sigma Aldrich                                                | Cat# T8787       |
| Vectashield Mounting Medium                                                   | Vector                                                       | Cat# H1000       |
| Schneider's <i>Drosophila</i> Medium                                          | Thermo Fisher Scientific                                     | Cat# 21720024    |
| Tetramethylrhodamine, Ethyl Ester, Perchlorate (TMRE)                         | Thermo Fisher Scientific                                     | Cat# T669        |
| Sucrose                                                                       | Sigma Aldrich                                                | Cat# S9378       |
| Tris Base                                                                     | Sigma Aldrich                                                | Cat# 10708976001 |
| Magnesium Chloride                                                            | Sigma Aldrich                                                | Cat# M8266       |
| <b>Critical Commercial Assays</b>                                             |                                                              |                  |
| cOmplete ULTRA Tablets, Mini, EDTA-free, EASYpack Protease Inhibitor Cocktail | Sigma Aldrich                                                | Cat# 5892791001  |
| Protein A conjugated 10nm gold nanoparticles                                  | Cyodiagnosics                                                | Cat# AC-10-05    |
| MitoSOX™                                                                      | Thermo Fisher Scientific                                     | Cat# M36008      |
| MitoTracker® Green                                                            | Thermo Fisher Scientific                                     | Cat# M7514       |
| RevertAid Reverse Transcriptase                                               | Thermo Fisher Scientific                                     | Cat# EP0442      |
| RiboLock RNase Inhibitor                                                      | Thermo Fisher Scientific                                     | Cat# E0382       |
| DNase I, RNase-free                                                           | Thermo Fisher Scientific                                     | Cat# EN0521      |
| Random Hexamer Primer                                                         | Thermo Fisher Scientific                                     | Cat# SO142       |
| dNTP Set 100 mM Solutions                                                     | Thermo Fisher Scientific                                     | Cat# R0181       |
| EDTA (0.5 M), pH 8.0                                                          | Thermo Fisher Scientific                                     | Cat# R1021       |
| PowerUp SYBR Green Master Mix                                                 | Thermo Fisher Scientific                                     | Cat# A25777      |
| ECL Prime Western Blotting System                                             | Sigma Aldrich                                                | Cat# GERPN2232   |
| <b>Experimental Models: Organisms/Strains</b>                                 |                                                              |                  |
| <i>D. melanogaster</i> : <i>w</i> <sup>1118</sup> ; <i>UAS-dp62-HA</i>        | <a href="#">de Castro et al., 2013</a>                       | N/A              |
| <i>D. melanogaster</i> : <i>w</i> <sup>1118</sup> ; <i>UAS-dp62-GFP</i>       | Thomas P. Neufeld (University of Minnesota, USA)             | N/A              |
| <i>D. melanogaster</i> : <i>UAS-Drp1</i> <sup>K38A</sup>                      | <a href="#">Park et al., 2009</a>                            | N/A              |
| <i>D. melanogaster</i> : <i>daughterless-GeneSwitch</i>                       | H. Tricoire (Université Paris Diderot–Paris7, Paris, France) | N/A              |
| <i>D. melanogaster</i> : <i>Elav-GeneSwitch (ElavGS)</i>                      | H. Keshishian (Yale University, New Haven, CT, USA)          | N/A              |
| <i>D. melanogaster</i> : <i>UAS-mito-QC</i>                                   | <a href="#">Lee et al., 2018</a>                             | N/A              |
| <i>D. melanogaster</i> : <i>mCherry-Atg8a</i>                                 | <a href="#">Denton et al., 2012</a>                          | N/A              |
| <i>D. melanogaster</i> : <i>white</i> <sup>1118</sup>                         | Bloomington <i>Drosophila</i> Stock Center                   | BDSC: 3605       |
| <i>D. melanogaster</i> : <i>UAS-GFP-dsRNA</i>                                 | Bloomington <i>Drosophila</i> Stock Center                   | BDSC: 9330       |
| <i>D. melanogaster</i> : <i>UAS-Atg1-RNAi</i>                                 | Vienna <i>Drosophila</i> RNAi Center                         | VDRC: 16133      |
| <i>D. melanogaster</i> : <i>UAS-Atg2-RNAi</i>                                 | Vienna <i>Drosophila</i> RNAi Center                         | VDRC: 108447     |
| <i>D. melanogaster</i> : <i>UAS-Atg5-RNAi</i>                                 | Vienna <i>Drosophila</i> RNAi Center                         | VDRC: 104461     |
| <i>D. melanogaster</i> : <i>UAS-Atg13-RNAi</i>                                | Vienna <i>Drosophila</i> RNAi Center                         | VDRC: 103381     |
| <i>D. melanogaster</i> : <i>UAS-parkin-RNAi</i>                               | Vienna <i>Drosophila</i> RNAi Center                         | VDRC: 104363     |
| <b>Oligonucleotides</b>                                                       |                                                              |                  |
| Primer for Act5C (Fwd)                                                        | TTGTCTGGGCAAGAGGATCAG                                        | N/A              |
| Primer for Act5C (Rev)                                                        | ACCACTCGCACTTGCACTTTC                                        | N/A              |
| Primer for Dp62 (Fwd)                                                         | CGTAAGGACCTTCTGGATCG                                         | N/A              |
| Primer for Dp62 (Rev)                                                         | GTGCATATTGCTCTCGCACT                                         | N/A              |
| Primer for Atg8a (Fwd)                                                        | AGTCCAAAAGCAAACGAAG                                          | N/A              |
| Primer for Atg8a (Rev)                                                        | TTGTCCAAATCACCGATGC                                          | N/A              |
| Primer for Hsp60 (Fwd)                                                        | TGATGCTGATCTCGTCAAGC                                         | N/A              |

(Continued on next page)

**Continued**

| REAGENT or RESOURCE        | SOURCE                | IDENTIFIER |
|----------------------------|-----------------------|------------|
| Primer for Hsp60 (Rev)     | TACTCGGAGGTGGTGCCTC   | N/A        |
| Primer for Hsc 70-5 (Fwrd) | GGAATTGATATCCGCAAGGA  | N/A        |
| Primer for Hsc 70-5 (Rev)  | TCAGCTTCAGGTTTCATGTGC | N/A        |
| Primer for Hsp10 (Fwrd)    | CCCGCATCTAGCGAGAATAG  | N/A        |
| Primer for Hsp10 (Rev)     | CTCCTTTGGTCTTGGTCAGC  | N/A        |

**LEAD CONTACT AND MATERIALS AVAILABILITY**

Further information and requests for resources and reagents should be directed to and will be fulfilled by the Lead Contact, David W. Walker ([davidwalker@ucla.edu](mailto:davidwalker@ucla.edu)).

**EXPERIMENTAL MODEL AND SUBJECT DETAILS*****Drosophila melanogaster***

Male flies were used in [Figure S1E](#). Female flies were used in all other figures.

**Fly Stocks**

The fly line *w<sup>1118</sup>;UAS-dp62-HA* was kindly provided by L. Martins (University of Leicester, UK). *w<sup>1118</sup>;UAS-dp62-GFP* was provided by Thomas P. Neufeld (University of Minnesota, USA). *UAS-Drp1<sup>K38A</sup>* was provided by J. Chung (Korea Advanced Institute of Science and Technology, Republic of Korea). *daughterless-GeneSwitch (daGS)* was provided by H. Tricoire (Université Paris Diderot–Paris7, Paris, France), and *Elav-GeneSwitch (ElavGS)* was provided by H. Keshishian (Yale University, New Haven, CT, USA). *UAS-mito-QC* was provided by Alexander J. Whitworth (University of Cambridge, UK) ([Lee et al., 2018](#)). *mCherry-Atg8a* stock was provided by S Kumar (Centre for Cancer Biology, Adelaide, Australia) ([Denton et al., 2012](#)). *white<sup>1118</sup>* (3605) and *UAS-GFP-dsRNA* (9330) were provided by the Bloomington Stock Center. *UAS-Atg1-RNAi* (16133), *UAS-Atg2-RNAi* (108447), *UAS-Atg5-RNAi* (104461), *UAS-Atg13-RNAi* (103381) and *UAS-parkin-RNAi* (104363) lines were received by Vienna *Drosophila* RNAi Center (VDRC).

**Fly Husbandry and Lifespan Analysis**

Flies were reared in vials containing cornmeal medium (1% agar, 3% yeast, 1.9% sucrose, 3.8% dextrose, 9.1% cornmeal, 1.1% acid mix, and 1.5% methylparaben, all concentrations given in wt/vol). Flies were collected under light nitrogen-induced anesthesia and housed at a density of 30 female flies per vial. All flies were kept in a humidified, temperature-controlled incubator with 12 h on/off light cycle at 25°C. RU486 was dissolved in ethanol and administered in the media while preparing food. Flies were flipped to fresh vial every 2–3 days and scored for death.

**METHOD DETAILS****Capillary Feeding Assay (CAFE Assay)**

Food intake was analyzed at day 37 using the Capillary Feeding (CAFE) assay as described previously ([Rana et al., 2013](#)) with modification. 100 flies per condition were tested, 10 flies were placed in vials with wet tissue paper at the bottom and a capillary food source [5% sucrose, 5% yeast extract, 2.5% FD&C Blue No. 1 (SPS Alfachem)]. Feeding was monitored for 10 hours, during light time and 30 min. after lights go off, feeding amount was recorded every 1–2 hours and the capillaries were replaced frequently.

**Spontaneous physical activity assay**

10 adult female flies were placed in a *Drosophila* activity monitor (TriKinetics). Movements were recorded continuously under normal culturing conditions for 36 h on a 12-h:12-h dark:light cycle. Bar graphs represent mean activity per fly per hour and the scatterplot shows spontaneous activity per fly during 12-h:12-h dark:light cycle. Triplicate samples were used for each activity measurement.

**Climbing activity**

100 adult female flies were placed in 100 ml glass cylinder. Cylinder was tapped quickly and flies were allowed to settle for 2 min. This step was repeated eight times. Then cylinder was tapped quickly and after 1 min, the number of flies in upper, middle, and lower 1/3<sup>rd</sup> part of the cylinder was recorded.

**Intestinal barrier dysfunction (Smurf) assay**

Intestinal integrity assay was performed as previously described in [Rera et al. \(2012\)](#). Flies were aged in normal food until the day of the assay (day 10, 28, 37, 44, and 51). The day before to the assay flies were transferred to new vials containing standard medium with



2.5% wt/vol F&D blue dye # 1 (SPS Alfacem). Flies were kept in this medium for 16 hours and flies with dye coloration outside the gut (smurf flies) were counted.

### Immunostaining and Image analysis

Flies were fixed in 3.7% formaldehyde in PBS for 20 minutes. After fixation hemi-thoraces were dissected and fixed again for 5 min. Samples were then rinsed 3 times for 10 min. with 0.2% Triton X-100 in PBS (PBST) and blocked in 3% BSA in PBST (PBST-BSA) for 1 hour. Primary antibodies were diluted in PBST-BSA and incubated overnight at 4°C. Primary antibodies used were: mouse-anti-FK2 1:250 (BML-PW8810-0500, ENZO); rabbit-anti-*dP62* 1:250 (Rana et al., 2017); rabbit-anti-*atg8a* 1:250 (Rana et al., 2017); mouse-anti-*atp5a* 1:250 (15H4C4, abcam); mouse-anti-*dsDNA* 1:250 (ab27156, abcam) and rabbit-anti-Lamp1 1:200 (ab30687, abcam). Hemi-thoraces were then rinsed 3 times in PBST for 10 min. and incubated with the secondary antibodies and/or stains at room temperature for 3 hours. Secondary antibodies used were: anti-rabbit or anti-mouse AlexaFluor-488 1:500 (Invitrogen); anti-rabbit or anti-mouse AlexaFluor-555 1:500 (Invitrogen); To-Pro-3 DNA stain 1:500 (Invitrogen); phalloidin AlexaFluor-568 1:250 (Invitrogen). Finally, samples were rinsed 3 times with PBST for 10 min. and mounted in Vectashield Mounting Medium (Vector Lab). Images were taken using Zeiss LSM780 confocal microscope and analyzed using the ImageJ software to measure mitochondrial and aggregates sizes.

### Immunogold Labeling and Electron Microscopy

Flies were fixed in 3.7% formaldehyde in PBS for 20 minutes. After fixation hemi-thoraces were dissected and fixed again for 5 min. Samples were then rinsed 3 times for 10 min with 0.2% Triton X-100 in PBS (PBST) and blocked in 3% BSA in PBST (PBST-BSA) for 1 hour. Primary antibodies, rabbit-anti-*Atg8a* 1:250 (Rana et al., 2017), were diluted in PBST-BSA and samples were incubated overnight at 4°C. Hemi-thoraces were then rinsed 3 times in PBST for 10 min. and incubated with the secondary antibody at room temperature for 3 hours. Secondary antibodies used were Protein A-gold conjugates diluted in blocking solution 1:80 (AC-10-05 Cyodiagnostic). Samples were then rinsed 3 times with PBST. Again samples were rinsed 3 times for 10 min in 0.1MPB. Sample fixation was done in 1% OsO<sub>4</sub> in 0.1MPB for 1 hour at RT. Samples were rinsed for 3 times, 10 minutes with ddH<sub>2</sub>O. Then samples were dehydrated for 15 min each in 30%, 50%; 70%; 95% ethanol and 2 times for 10 min in 100% ethanol. Samples were transferred to propylene oxide (PO) two times for 15 min each and then to 1:1 mix of PO:epon resin for 1 hour. Then samples were transferred to 1:2 mix of PO:epon for several hours capped. Samples were then uncapped and left overnight. Then samples were transferred to fresh epon and placed in vacuum for several hours and allowed to polymerize at 60°C for 48hours. Semi-thin sections (1.5 μm) were cut on an ultramicrotome and stained with toluidine blue. The muscle area of interest was identified from these sections. For EM, sections of 70 nm thickness were prepared from the identified area, placed on formvar coated copper grids and stained with uranyl acetate and Reynolds' lead citrate. The grids were examined using a JEOL 100CX transmission electron microscope at 60 kV (Electron Microscopy Facility, UCLA Brain Research Institute).

### TMRE Staining

Flies were anesthetized and dissected in cold *Drosophila* Schneider's Medium (DSM). Hemi-thoraces were incubated in TMRE staining solution (100nm TMRE (T669, Thermo Fisher Scientific) in DSM) for 12 min. at room temperature. After staining samples were rinsed once in wash solution (25nm TMRE in DSM) for 30 s. Hemi-thoraces were mounted in wash solution. Images were acquired in a Zeiss LSM780 confocal using identical setting for each condition. TMRE intensity was quantified using ImageJ software.

### MitoSox staining

Flies were anesthetized and dissected in cold *Drosophila* Schneider's Medium (DSM). Hemi-thoraces were incubated in staining solution (5 μM MitoSox<sup>TM</sup> Red (M36008, Thermo Fisher Scientific) and 100nM MitoTracker<sup>®</sup> Green (M7514, Thermo Fisher Scientific) for 12 min. at room temperature. Hemi-thoraces were rinsed two times for 30 s at room temperature with DSM. Samples were mounted in DSM solution. Images were acquired in a Zeiss LSM780 confocal using identical setting for each condition. MitoSox intensity was quantified using ImageJ software.

### Mito-QC staining

Flies were anesthetized and dissected in cold *Drosophila* Schneider's Medium (DSM). Brains and guts were mounted in DSM solution. Images were acquired in a Zeiss LSM780 confocal using identical setting for each condition. Mitolysosomes (mCherry-only foci) were quantified using same parameters in the image calculator option in ImageJ software

### Western Blot Assay

Whole flies (5 flies per sample) were homogenized in Lysis Buffer (PBS 1X, Protease Inhibitors 1X, NuPAGE LDS Sample Buffer 1X, and DTT (Dithiothreitol) 0.05M). For Triton fraction, 10 flies were homogenized in Triton Buffer (Triton X-100 1%, PBS 1X and Protease Inhibitor 1X). Samples were spun at 13000 X g for 5 min. at 4°C, then supernatant (Triton fraction) was transferred to a new vial containing 4X Buffer (NuPAGE LDS Sample Buffer 4X, and DTT 0.05M). Samples from whole flies or Triton fraction were separated by SDS-PAGE gels and proteins were transferred to Nitrocellulose membranes. Samples were collected and lysates were separated by SDS-PAGE using standard procedures. Membranes were probed with antisera against: anti- $\alpha$ -actin peroxidase conjugated 1:15000 (A3854, Sigma), mouse-anti-VDAC1 / Porin 1:10000 (ab14734, Abcam), rabbit-anti-*dP62* 1:2500 (3), anti-GABARAP (ab109364, Abcam),

rabbit-anti-HA (3724, Cell Signaling) and mouse-anti-ubiquitin (P4D1) 1:1000 (3936, Cell Signaling). Anti-Rabbit or anti-Mouse Horseradish peroxidase conjugated antibodies were used for detection at 1:10000 dilution. Amersham ECL Prime Western Blotting Detection Reagent (GE life sciences) was used to visualize the presence of horseradish peroxidase, and the chemiluminescent signal was recorded using Syngene Pxi Western Blot Imager. Image analysis was done using ImageJ.

### **Mitochondria Purification**

Whole flies (25 flies per sample) were gently homogenized in cold mitochondrial isolation medium (MIM) [250mM sucrose, 10mM Tris·HCl (pH 7.4), 0.15 mM MgCl<sub>2</sub>] using a plastic pestle homogenizer and then spun twice at 500 × g for 5 min at 4°C to remove debris. The supernatant was then spun at 5,000 × g, for 5 min at 4°C. The pellet, containing the mitochondria, was stored at –80°C and dissolved in Lysis Buffer as previously described.

### **RNA extraction, cDNA synthesis and Quantitative Real-Time PCR**

Total RNA was extracted from whole flies. Samples were treated with DNase, and then cDNA synthesis was carried out using the First Strand cDNA Synthesis Kit from Fermentas. PCR was performed with PowerUP SYBR Green Master Mix (Ref#A25777, Applied Biosystems) on a BioRad Real Time PCR system. Cycling conditions were as follows: 95°C for 10 minutes; 95°C for 15 s then 60°C for 60 s, cycled 40 times, and equalized amplicons of Actin5C were used as a reference to normalize.

### **QUANTIFICATION AND STATISTICAL ANALYSIS**

Prism5 (GraphPad) was used to perform the statistical analysis and graphical display of the data. Significance is expressed as *p* values. For comparisons of two groups, an unpaired *t* test was used. For comparisons of more than two groups, ANOVA with Bonferroni post hoc test was performed. Bar graph depicts mean ± SEM. Boxplots display the first and third quartile, with the horizontal bar at the median and whiskers showing the most extreme data point, which is no more than 1.5 times the interquartile range from the box. The difference between two groups was defined as statistically significant for the following *p* values: \* < 0.05, \*\* < 0.01, \*\*\* < 0.001. The number (*n*) of biological samples used in each experiment and what *n* represents can be found in each figure legend. Log-rank (Mantel-Cox) test was used for survival curves comparison. The difference between survival curves was defined as statistically significant as follow: Significant < 0.0001 and non significant > 0.0001.

For comparison of survival curves, Log-rank (Mantel-Cox) test was used. Physiological and biochemical results were compared by Student's *t* test or ANOVA with Bonferroni post hoc tests. No methods were used to determine whether the data met assumptions of the statistical approach.

Cell Reports, Volume 28

**Supplemental Information**

**Upregulation of the Autophagy Adaptor p62/SQSTM1**

**Prolongs Health and Lifespan**

**in Middle-Aged *Drosophila***

**Ricardo Aparicio, Anil Rana, and David W. Walker**

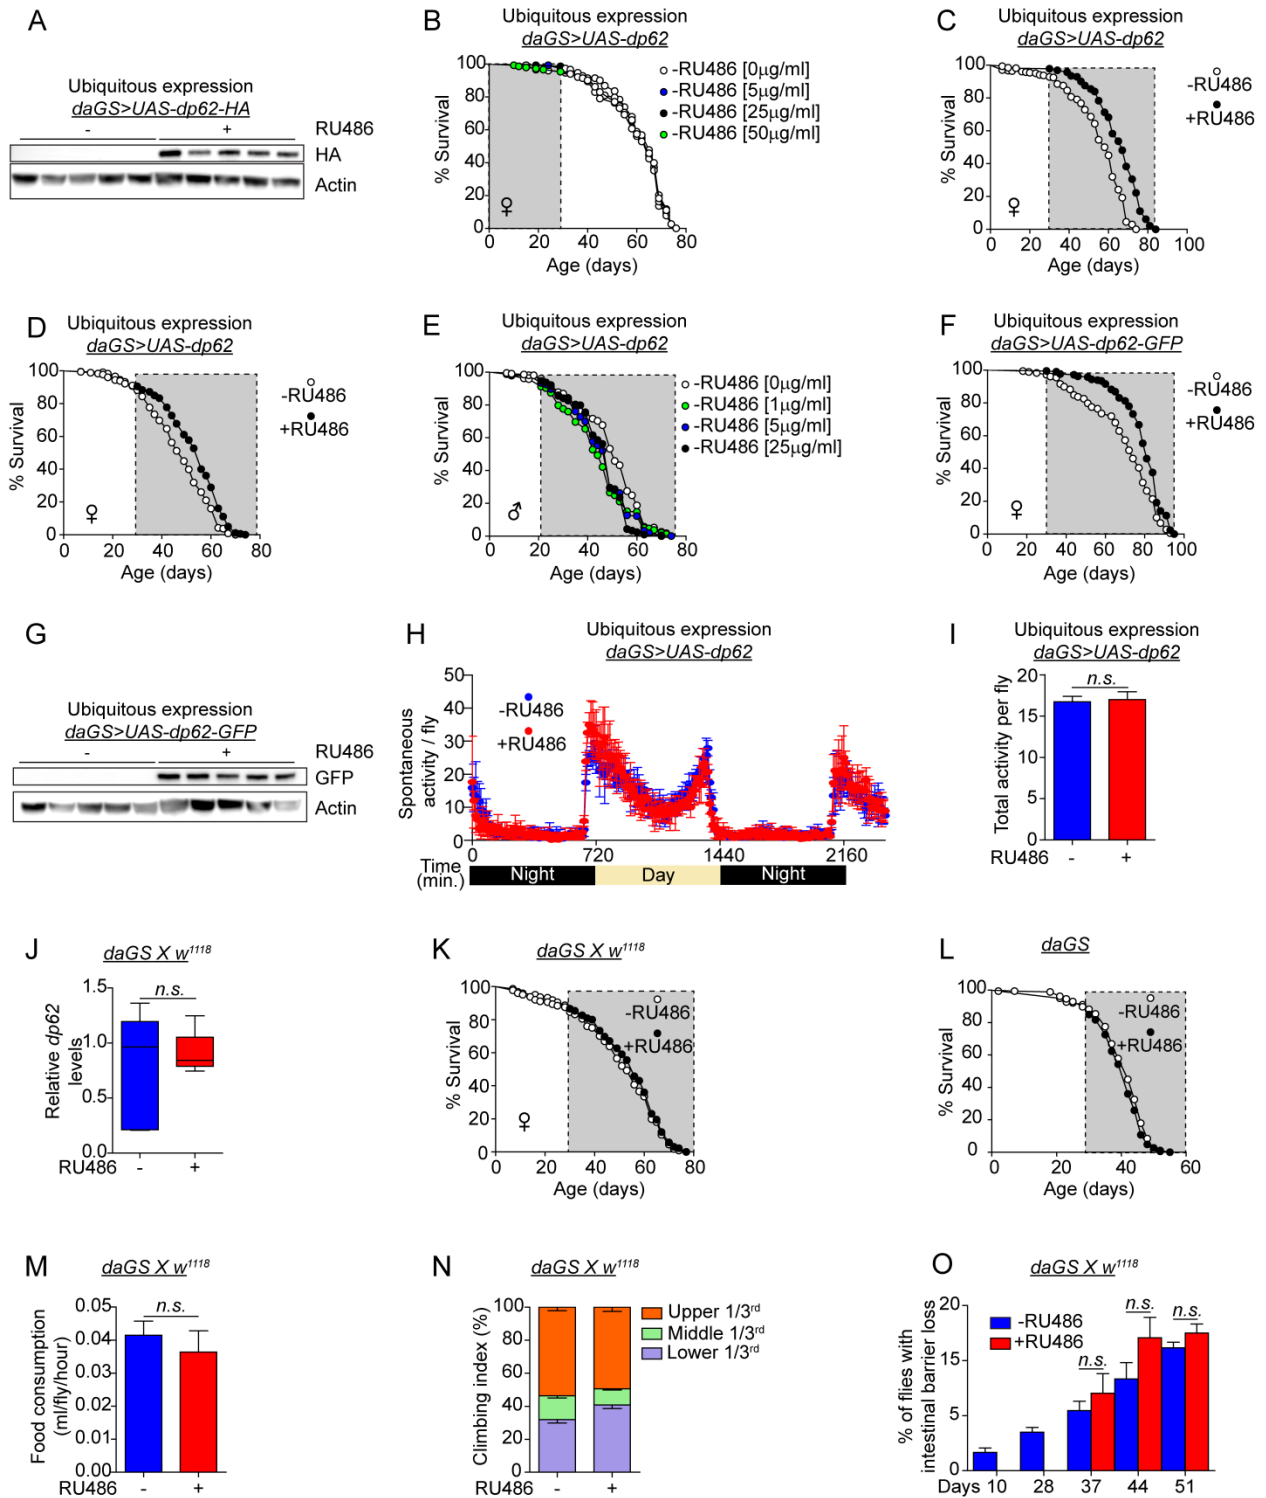

**Figure S1, related to Figure 1. Midlife *dp62* induction extends lifespan and RU486 treatment in control flies has no effect on lifespan and healthspan.**

- (A) Western blot detection of HA levels in day 37 *daGS>UAS-dp62HA* females with or without RU486-mediated transgene induction from day 30 to day 37.
- (B) Survival curves of *daGS>UAS-dp62* females with or without RU486-mediated transgene induction from day 1 until day 30. The shaded area indicates the duration of *dp62* induction.  $p = 0.9980$ , log-rank test;  $n > 150$  flies.
- (C) Survival curves of *daGS>UAS-dp62* females with or without RU486-mediated transgene induction from day 30 onwards. The shaded area indicates the duration of *dp62* induction.  $p < 0.0001$ , log-rank test;  $n > 300$  flies.
- (D) Survival curves of *daGS>UAS-dp62* females with or without RU486-mediated transgene induction from day 30 onwards. The shaded area indicates the duration of *dp62* induction.  $p < 0.0001$ , log-rank test;  $n > 180$  flies.
- (E) Survival curves of *daGS>UAS-dp62* males with or without RU486-mediated transgene induction from day 30 onwards. The shaded area indicates the duration of *dp62* induction.  $p = 0.0002$ , log-rank test;  $n > 200$  flies.
- (F) Survival curves of *daGS>UAS-dp62GFP* females with or without RU486-mediated transgene induction from day 30 onwards. The shaded area indicates the duration of *dp62* induction.  $p < 0.0001$ , log-rank test;  $n > 175$  flies.

- (G) Western blot detection of GFP levels in day 37 *daGS>UAS-dp62GFP* females with or without RU486-mediated transgene induction from day 30 to day 37.
- (H) Spontaneous physical activity of 37 days old *daGS>UAS-dp62* females with or without RU486-mediated transgene induction from day 30 to day 37.
- (I) Quantification of total activity per fly per hour from spontaneous activity graph (S1H). n = 3 vials of 10 flies per condition;  $p > 0.5$  and is non-significant (n.s.); Unpaired t-test.
- (J) qPCR analyses of *dp62* mRNA levels on day 37 in *daGS X w<sup>1118</sup>* females with and without RU486 mediated transgene induction for 7 days (day 30 to day 37). n = 5 biological replicates with 3 flies per replicate;  $p > 0.5$  and is non-significant (n.s.); Unpaired t-test.
- (K) Survival curves of *daGS X w<sup>1118</sup>* females with or without RU486-mediated transgene induction from day 30 onwards. The shaded area indicates the duration of RU486 feeding.  $p = 0.2732$ , log-rank test;  $n > 220$  flies.
- (L) Survival curves of *daGS* females with or without RU486-mediated transgene induction from day 30 onwards. The shaded area indicates the duration of RU486 feeding.  $p = 0.1204$ , log-rank test;  $n > 178$  flies.

(M) Capillary FEeding assay (CAFE) of 37 day old *daGS X w<sup>1118</sup>* females with or without RU486-mediated transgene induction from day 30 to day 37. n = 10 vials of 10 flies per condition;  $p > 0.5$  and is non-significant (n.s.); Unpaired t-test.

(N) Climbing index as a measure of endurance of 37 day old *daGS X w<sup>1118</sup>* females with or without RU486-mediated transgene induction from day 30 to day 37. n = 3 biological replicates with 100 flies per replicate;  $p > 0.5$  and is non-significant (n.s.); Unpaired t-test.

(O) Intestinal integrity during aging of *daGS X w<sup>1118</sup>* females with or without RU486-mediated transgene induction since midlife (day 30) onwards. n = 371 flies on day 10;  $p > 0.5$  and is non-significant (n.s.); one-way ANOVA/Bonferroni's multiple comparisons test.

RU486 was provided in the media at a concentration of 25  $\mu\text{g/ml}$  for (A, C-D, F-O); 5  $\mu\text{g/ml}$ , 25  $\mu\text{g/ml}$  and 50  $\mu\text{g/ml}$  for (B) and 1  $\mu\text{g/ml}$ , 5  $\mu\text{g/ml}$  and 25  $\mu\text{g/ml}$  for (E).

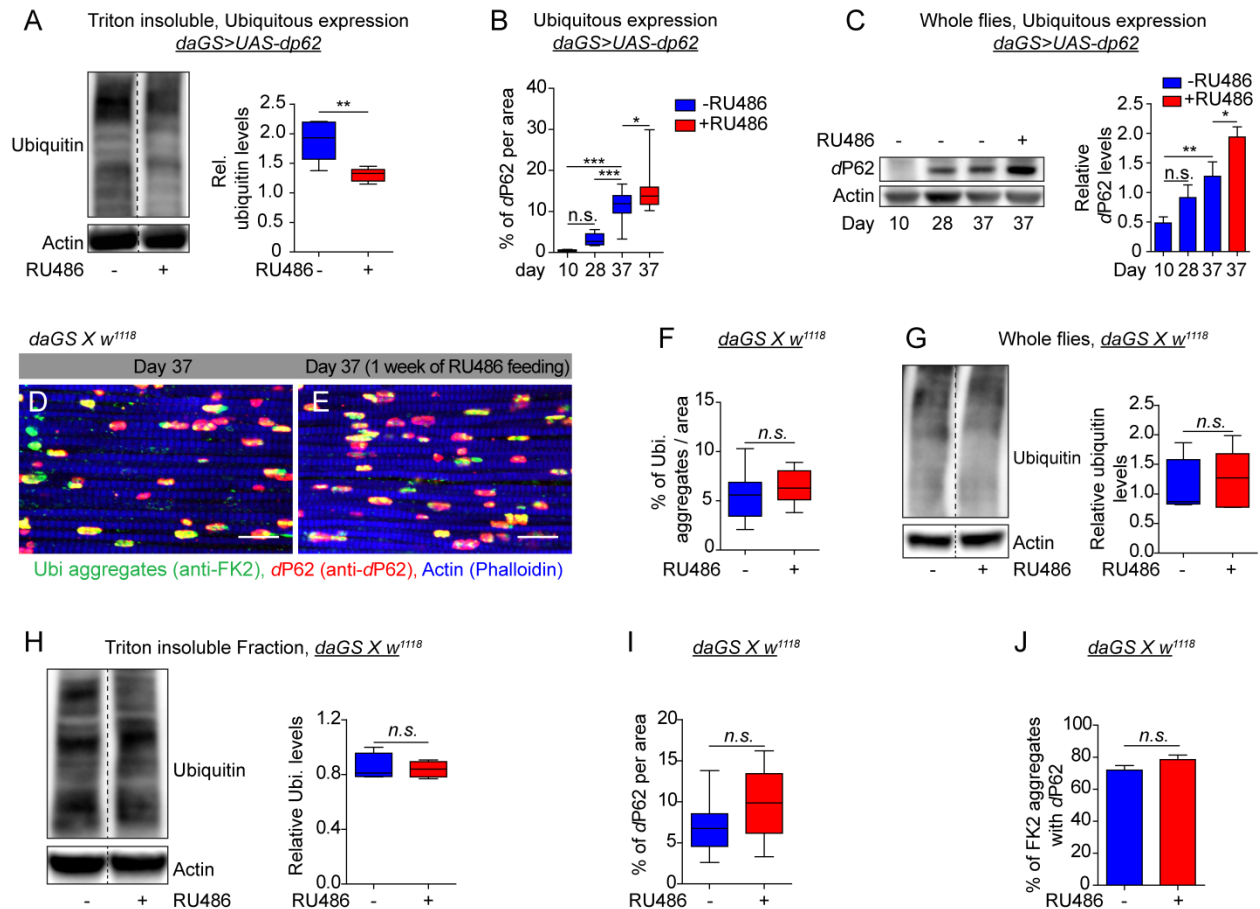

**Figure S2, related to Figure 2. Midlife *dp62* induction improves proteostasis and RU486 treatment in control flies has no effect on proteostasis in aged flies.**

(A) Western blot detection and densitometry of ubiquitin conjugated proteins from Triton Insoluble fraction extracted from day 37 *daGS>UAS-dp62* females with or without RU486-mediated transgene induction from day 30 to day 37. n = 5 replicates with 5 flies per replicate; \*\*p < 0.01; Unpaired t test.

(B) Quantification of dP62 in muscle as shown in (Fig 2A'-2D'). n > 8 flies; \*\*\*p < 0.001 and \*p < 0.01; one-way ANOVA/Bonferroni's multiple comparisons test.



(C) Western blot detection and densitometry of *dP62* in whole flies extracts from day 10, 28 and 37 *daGS>UAS-dp62* females with or without RU486-mediated transgene induction from day 30 to day 37.  $n = 3$  replicates with 5 flies per replicate;  $**p < 0.01$ ,  $*p < 0.05$  and  $p > 0.5$  is non-significant (n.s.); one-way ANOVA/Bonferroni's multiple comparisons test.

(D-E) Immunostaining of indirect flight muscles from day 37 *daGS X w<sup>1118</sup>* females with or without RU486 from day 30 to day 37, showing ubiquitinated aggregates (green channel, anti-FK2); *dP62* (red channel, anti-*dP62*); and muscles (blue channel stained with phalloidin/F-Actin). Scale bar is 10  $\mu\text{m}$ .

(F) Quantification of ubiquitin aggregates in muscle as shown in (S2D and S2E).  $n > 8$  flies;  $p > 0.5$  and is non-significant (n.s.); Unpaired t-test.

(G) Western blot detection and densitometry of total ubiquitin-conjugated proteins from day 37 *daGS X w<sup>1118</sup>* females with or without RU486-mediated transgene induction from day 30 to day 37.  $n = 5$  replicates with 5 flies per replicate;  $p > 0.5$  and is non-significant (n.s.); Unpaired t-test.

(H) Western blot detection and densitometry of total ubiquitin-conjugated proteins from Triton Insoluble fraction extracted from day 37 *daGS X w<sup>1118</sup>* females with or without RU486-mediated transgene induction from day 30 to day 37.  $n = 5$  replicates with 5 flies per replicate;  $p > 0.5$  and is non-significant (n.s.); Unpaired t-test.

(I) Quantification of *dP62* in muscle as shown in (S2D and S2E).  $n > 8$  flies;  $p > 0.5$  and is non-significant (n.s.); Unpaired t-test.

(J) Quantification of colocalization of ubiquitin aggregates with *dP62* as shown in (S2D and S2E).  $n > 8$  flies;  $p > 0.5$  and is non-significant (n.s.); Unpaired t-test.

RU486 was provided in the media at a concentration of 25  $\mu\text{g/ml}$ .

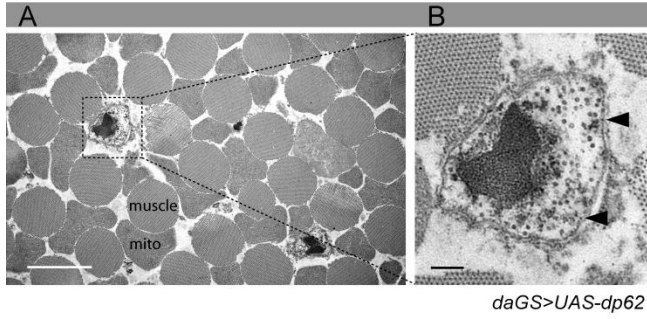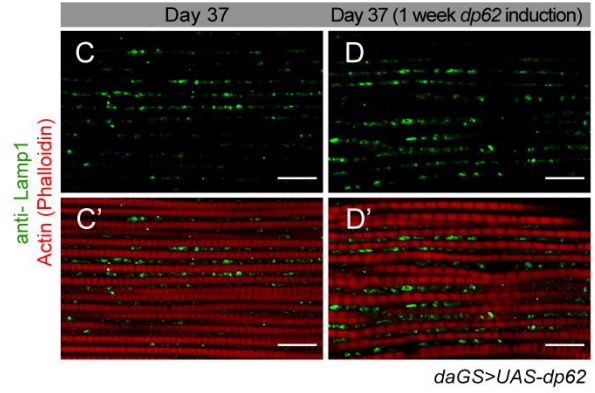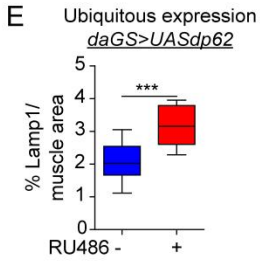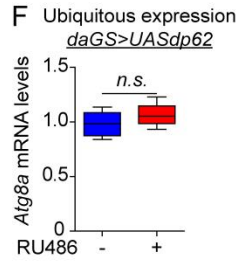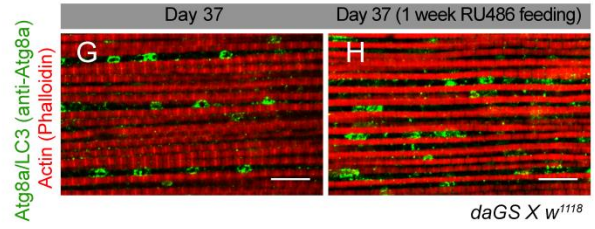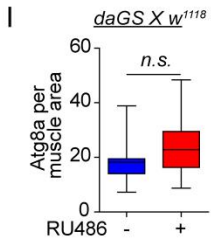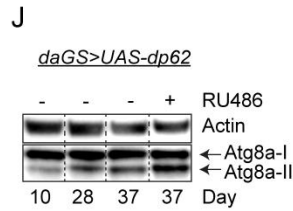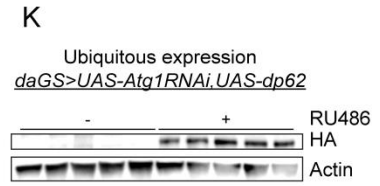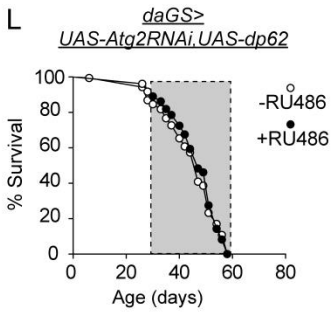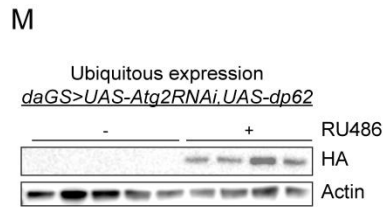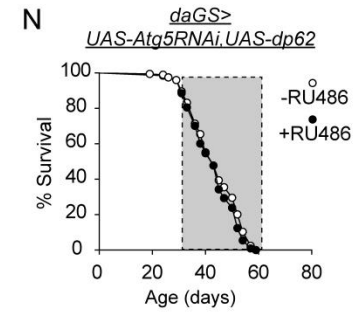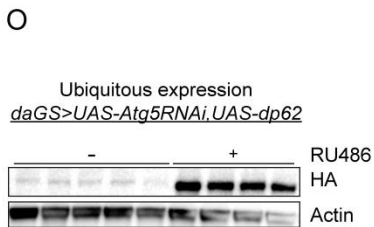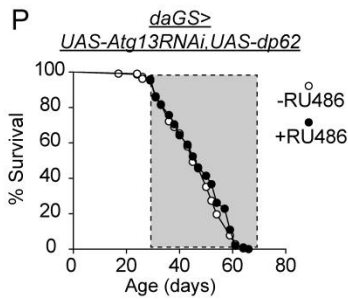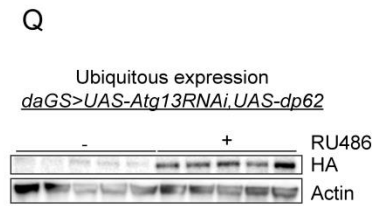

**Figure S3, related to Figure 3. Midlife *dp62* induction requires autophagy to promote longevity and RU486 treatment in control flies does not alter *Atg8a* levels.**

(A-B) Transmission electron microscopy coupled with immuno staining of indirect flight muscle from day 37 *daGS>UAS-dp62* females, showing *Atg8a* antibody can label autophagosomes/autolysosomes (AP/AL); double membrane structures enclosing cellular materials. mito (mitochondria). Scale bar 2  $\mu\text{m}$  (A) and 400 nm (B).

(C-D and C'-D') Immunostaining of indirect flight muscles from day 37 *daGS>UAS-dp62* females with or without RU486-mediated transgene induction from day 30 to day 37, showing Lamp1 (green channel, anti-Lamp1); and muscles (red channel, stained with phalloidin/F-actin). Scale bar is 10  $\mu\text{m}$ .

(E) Quantification of Lamp1 in muscle as shown in (S3C and S3D).  $n > 13$  flies; \*\*\* $p < 0.0001$ ; Unpaired t-test.

(F) qPCR analyses of *Atg8a* mRNA levels on day 37 in *daGS>UAS-dp62* females with and without RU486 mediated transgene induction from day 30 to day 37.  $n = 5$  biological replicates with 3 flies per replicate;  $p > 0.5$  and is non-significant (n.s.); Unpaired t-test.

(G-H) Immunostaining of indirect flight muscles from day 37 *daGS X w<sup>1118</sup>* females with or without RU486-mediated transgene induction from day 30 to day 37, showing *Atg8a*/LC3 foci (green channel, anti-*Atg8a*); and muscles (red channel, stained with phalloidin/F-actin). Scale bar is 10  $\mu\text{m}$ .

- (I) Quantification of Atg8a/LC3 foci in muscle as shown in (S3G and S3H).  $n > 10$  flies;  $p > 0.5$  and is non-significant (n.s.); Unpaired t-test.
- (J) Western blot detection of Atg8a and Actin levels in thoraces extracts from day 10, 28 and 37 *daGS>UAS-dp62* females with or without RU486-mediated transgene induction from day 30 to day 37.
- (K) Western blot detection of HA levels in day 37 *daGS>UAS-Atg1RNAi, UAS-dp62HA* females with or without RU486-mediated transgene induction from day 30 to day 37.
- (L) Survival curves of *daGS>UAS-Atg2RNAi, UAS-dp62* females with or without RU486-mediated transgene induction from day 30 onwards. The shaded area indicates the duration of *Atg2RNAi* and *dp62* induction.  $p = 0.6270$ , log-rank test;  $n > 176$  flies.
- (M) Western blot detection of HA levels in day 37 *daGS>UAS-Atg2RNAi, UAS-dp62HA* females with or without RU486-mediated transgene induction from day 30 to day 37.
- (N) Survival curves of *daGS>UAS-Atg5RNAi, UAS-dp62* females with or without RU486-mediated transgene induction from day 30 onwards. The shaded area indicates the duration of *Atg5RNAi* and *dp62* induction.  $p = 0.1705$ , log-rank test;  $n > 203$  flies.

(O) Western blot detection of HA levels in day 37 *daGS>UAS-Atg5RNAi, UAS-dp62HA* females with or without RU486-mediated transgene induction from day 30 to day 37.

(P) Survival curves of *daGS>UAS-Atg13RNAi, UAS-dp62* females with or without RU486-mediated transgene induction from day 30 onwards. The shaded area indicates the duration of *Atg13RNAi* and *dp62* induction.  $p = 0.2952$ , log-rank test;  $n > 210$  flies.

(Q) Western blot detection of HA levels in day 37 *daGS>UAS-Atg13RNAi, UAS-dp62HA* females with or without RU486-mediated transgene induction from day 30 to day 37.

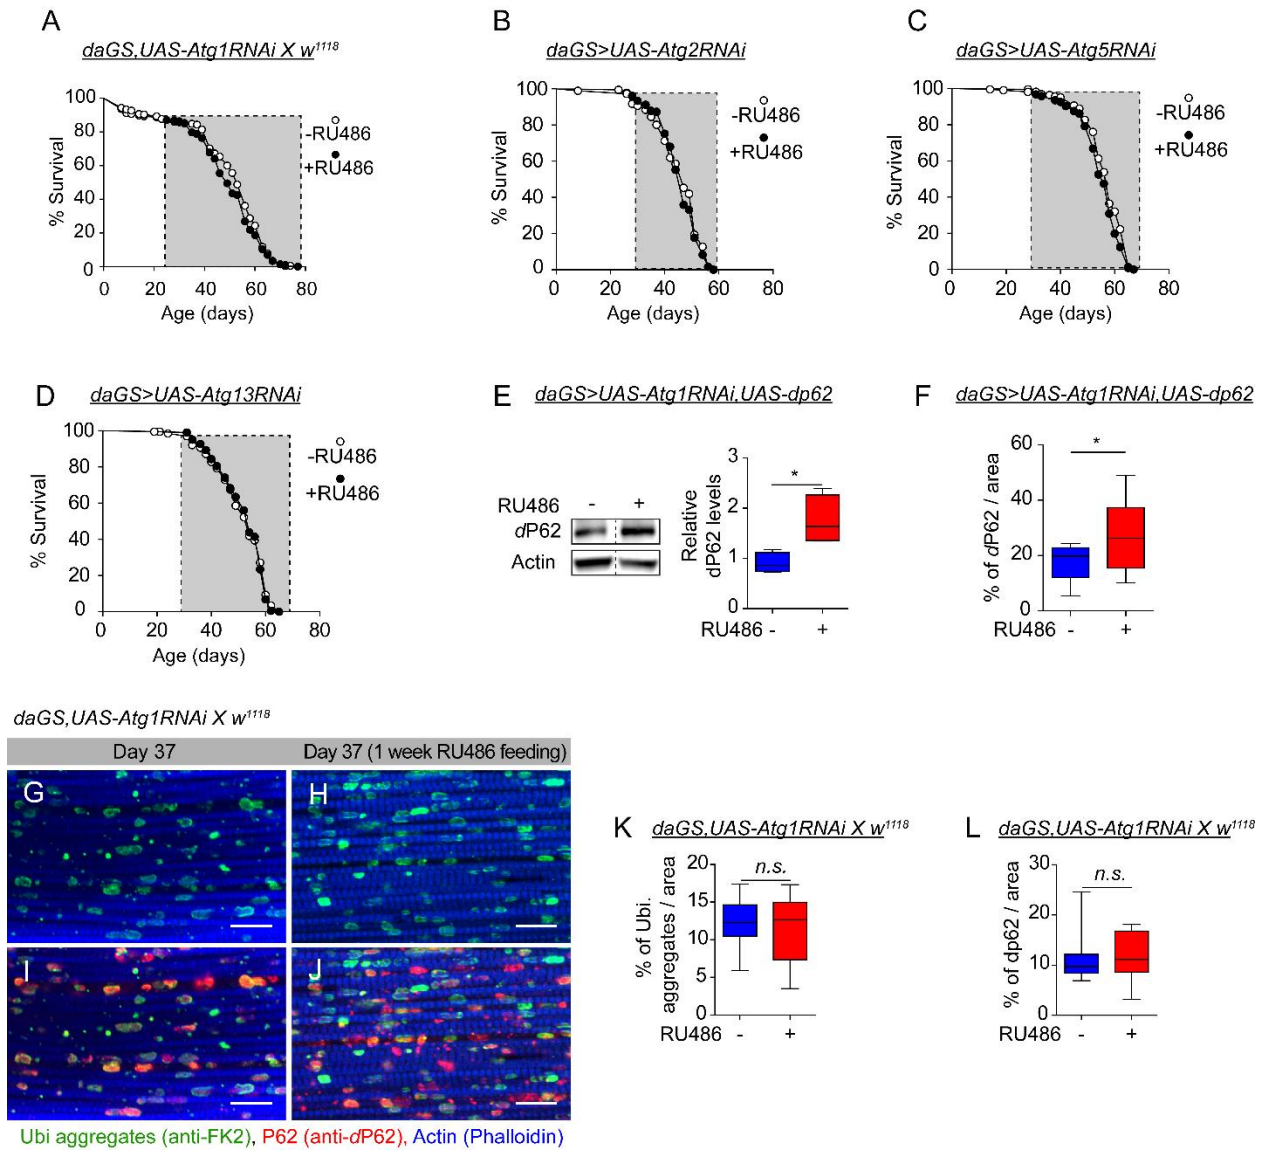

**Figure S4, related to Figure 3. Midlife RNAi of Atg genes does not alter fly lifespan and RU486 treatment in Atg1 RNAi flies does not alter proteostasis or dP62 levels.**

(A) Survival curves of *daGS, UAS-Atg1RNAi X w<sup>1118</sup>* females with or without RU486-mediated transgene induction from day 30 onwards. The shaded area indicates the duration of *Atg1RNAi* induction.  $p = 0.1092$ , log-rank test;  $n > 205$  flies.

(B) Survival curves of *daGS>UAS-Atg2RNAi* females with or without RU486-mediated transgene induction from day 30 onwards. The shaded area indicates the duration of *Atg2RNAi* induction.  $p = 0.3511$ , log-rank test;  $n > 181$  flies.

(C) Survival curves of *daGS>UAS-Atg5RNAi* females with or without RU486-mediated transgene induction from day 30 onwards. The shaded area indicates the duration of *Atg5RNAi* induction.  $p = 0.0079$ , log-rank test;  $n > 180$  flies.

(D) Survival curves of *daGS>UAS-Atg13RNAi* females with or without RU486-mediated transgene induction from day 30 onwards. The shaded area indicates the duration of *Atg5RNAi* induction.  $p = 0.5924$ , log-rank test;  $n > 203$  flies.

(E) Western blot detection and densitometry of *dP62* in day 37 old *daGS>UAS-Atg1RNAi, UAS-dp62* females with or without RU486-mediated transgene induction from day 30 to day 37.  $n = 5$  replicates with 5 flies per replicate;  $*p < 0.05$ ; unpaired t test.

(F) Quantification of *dP62* in muscle as shown in (Fig 3M' and 3N').  $n = 14$  flies;  $*p < 0.1$ ; Unpaired t-test.

(G-H and I-J) Immunostaining of indirect flight muscles from day 37 *daGS, UAS-Atg1RNAi X w<sup>1118</sup>* females with or without RU486-mediated transgene induction from day 30 to day 37, showing ubiquitinated proteins (green channel, anti-FK2); *dP62* (red channel, anti-*dP62*) and muscles (blue channel, stained with phalloidin/F-actin). Scale bar is 10  $\mu\text{m}$ .



(K) Quantification of ubiquitin aggregates in muscle as shown in S4G and S4H.  $n = 10$  flies;  $p > 0.5$  and is non-significant (n.s.); Unpaired t-test.

(L) Quantification of *dP62* in muscle as shown in S4I and S4J.  $n = 10$  flies;  $p > 0.5$  and is non-significant (n.s.); Unpaired t-test.

RU486 was provided in the media at a concentration of 25  $\mu\text{g/ml}$ .

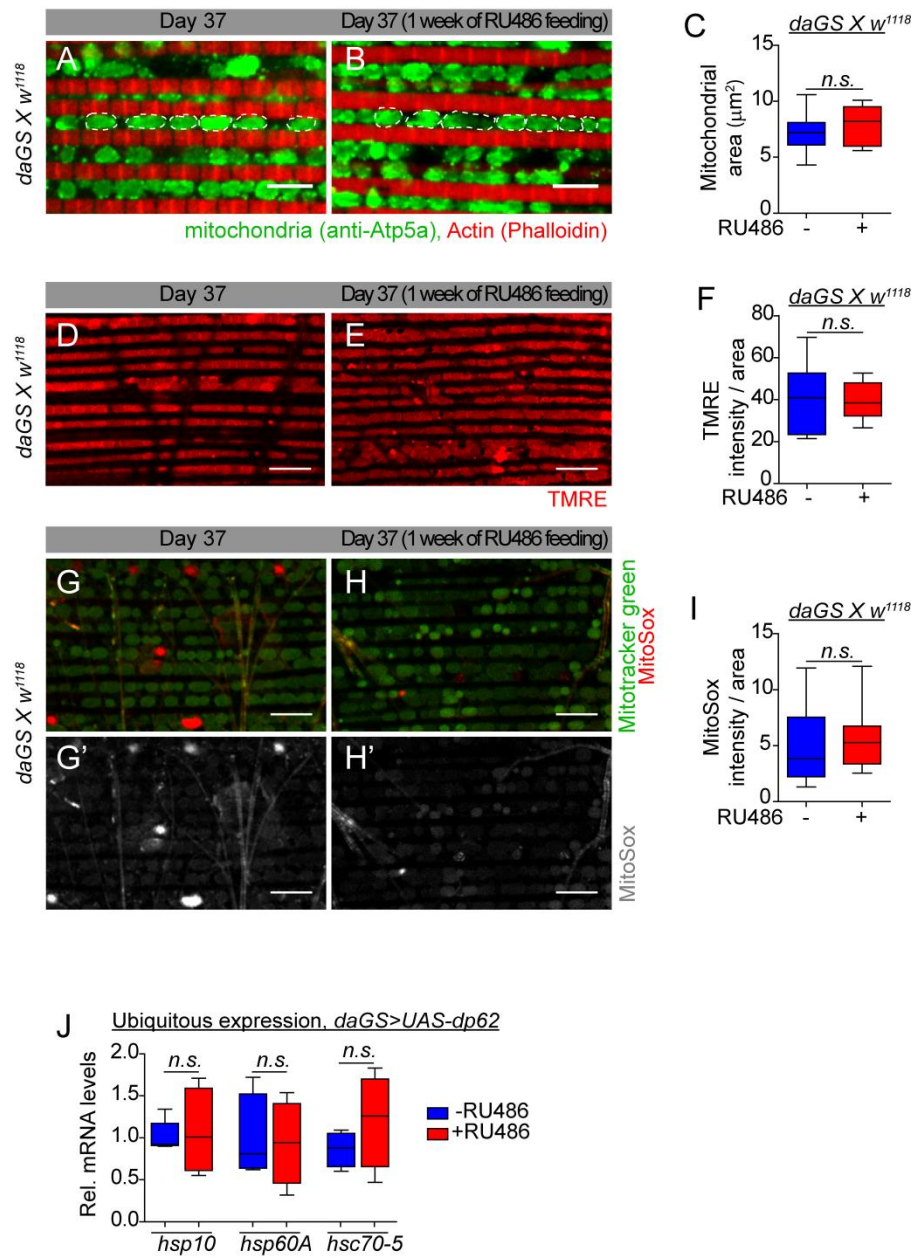

**Figure S5, related to Figure 4. RU486 treatment in control flies has no effect on mitochondria function.**

(A-B) Immunostaining of indirect flight muscles from day 37 *daGS X w<sup>1118</sup>* females with or without RU486-mediated transgene induction from day 30 to day 37, showing mitochondrial morphology (green channel, anti-ATP5a); muscles (red channel, stained with phalloidin/F-actin). Scale bar is 5  $\mu\text{m}$ .

(C) Quantification of mitochondrial area in muscle as shown in (S4A and S4B).  $n = 9$  flies;  $p > 0.5$  and is non-significant (n.s.); Unpaired t-test.

(D-E) Staining of indirect flight muscles from day *daGS X w<sup>1118</sup>* females with or without RU486-mediated transgene induction from day 30 to day 37 showing TMRE fluorescence. Scale bar is 10  $\mu\text{m}$ .

(F) Quantification of mitochondrial membrane potential measured by TMRE staining as shown in (S4D and S4E).  $n = 13$  flies;  $p > 0.5$  and is non-significant (n.s.); Unpaired t-test.

(G-H and G'-H') Staining of indirect flight muscles from 37 day old *daGS X w<sup>1118</sup>* females with or without RU486-mediated transgene induction from day 30 to day 37, showing mitochondria (green channel, Mitotracker green staining) and levels of superoxide radicals (red channel, staining with MitoSOX reagent). Scale bar is 10  $\mu\text{m}$ .

(I) Quantification of free superoxide radicals as shown in (S4G' and S4H');  $n > 14$  biological replicates;  $p > 0.5$  and is non-significant (n.s.); Unpaired t-test.

(J) qPCR analyses of *Hsp10*, *Hsp60A* and *Hsc70-5* mRNA levels on day 37 in *daGS > UAS-dp62* females with and without RU486 mediated transgene induction for 7 days (day 30 to day 37).  $n = 5$  biological replicates with 3 flies per replicate;  $p > 0.5$  and is non-significant (n.s.); one-way ANOVA/Bonferroni's multiple comparisons test.

RU486 was provided in the media at a concentration of 25  $\mu\text{g/ml}$ .

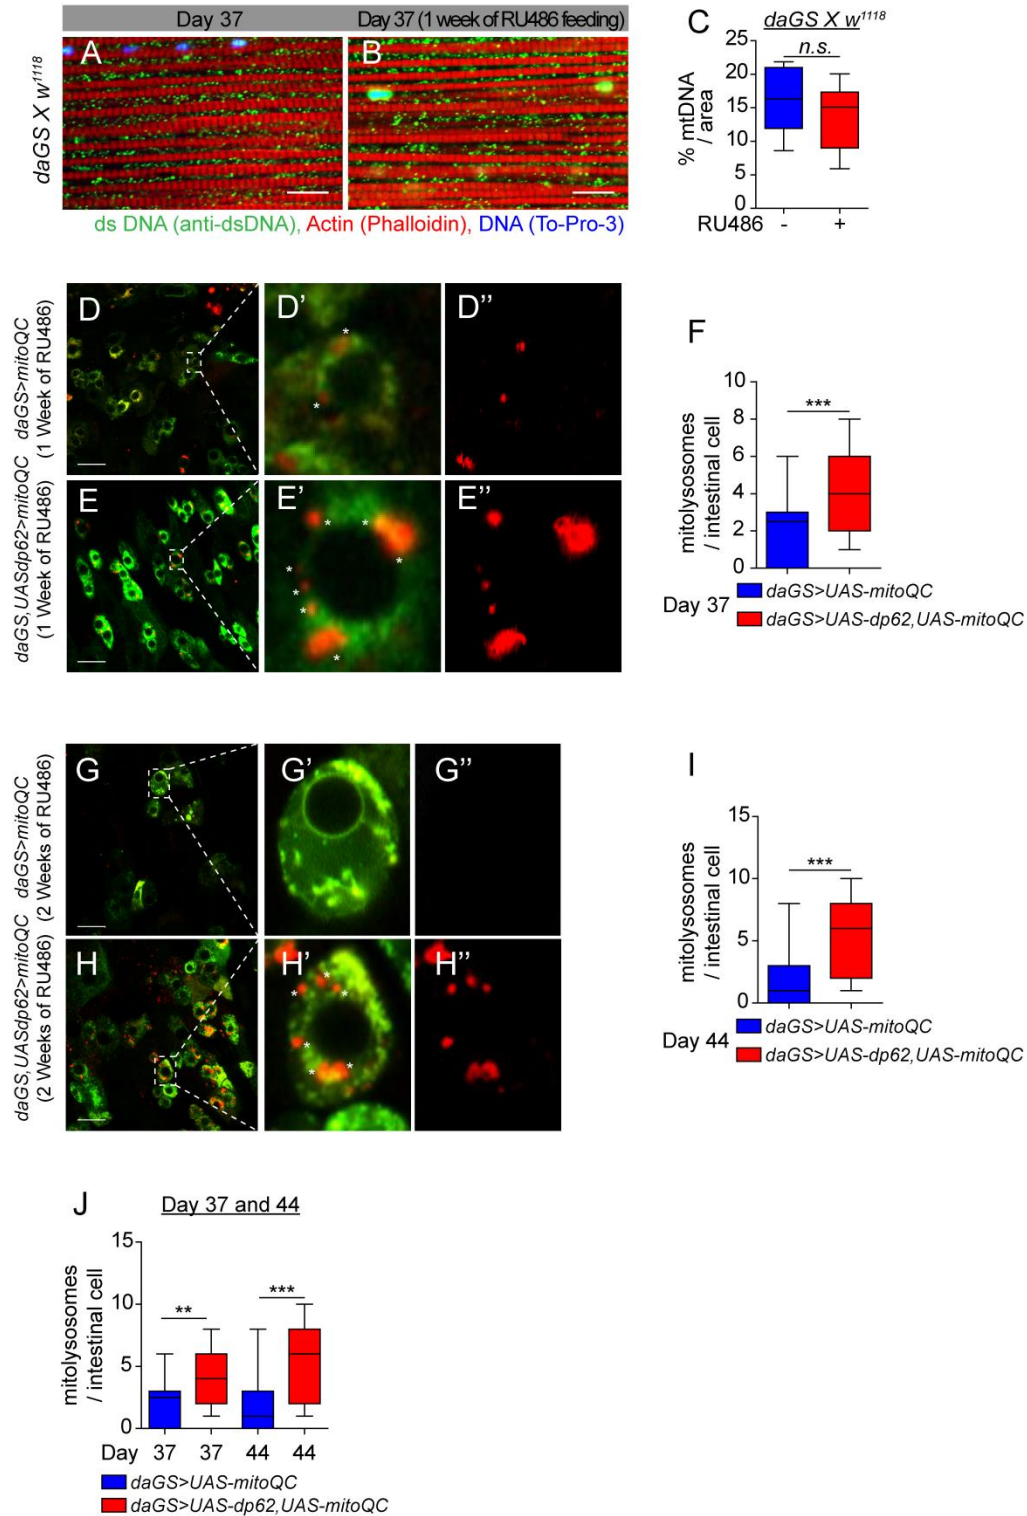

**Figure S6, related to Figure 5. Midlife p62 induction stimulates mitophagy in intestinal cells and RU486 treatment in control flies has no effect on mtDNA levels.**

(A-B) Immunostaining of indirect flight muscles from day 37 *daGS X w<sup>1118</sup>* females with or without RU486-mediated transgene induction from day 30 to day 37, showing dsDNA (green channel, anti dsDNA); muscles (red channel, stained with phalloidin/F-actin); and DNA (blue channel, To-Pro 3 stain). Scale bar is 5  $\mu\text{m}$ .

(C) Quantification of mitochondrial DNA in muscle as shown in (S5A and S5B).  $n = 10$  flies;  $p > 0.5$  and is non-significant (n.s.); Unpaired t-test.

(D-E and G-H) *mito-QC* of gut cells from 37 (D-E) and 44 (G-H) day old females. Genotypes analyzed were *daGS>UAS-dp62*, *UAS-mito-QC* and *daGS>UAS-mito-QC* females with RU486-mediated transgene induction from day 30 to day 37 and from day 30 to day 44, showing merged image of GFP and mCherry (D-E; D'-E'; G-H and G'-H') and punctate mCherry-only foci (resulting from merged image where GFP has been quenched; mitolysosomes) (D''-E'' and G''-H''). \* indicates mCherry-only foci in D'-E' and G'-H'. Scale bar is 20  $\mu\text{m}$ .

(F, I and J) Quantification of mitolysosomes in gut cells as shown in (D''-E'' and G''-H''), day 37 (F), day 44 (I), and day 37 and 44 (J).  $n > 10$  cells; \*\*\* $p < 0.001$ ; unpaired t test (F). \*\*\* $p < 0.001$ ; unpaired t test (I). \*\*\* $p < 0.001$  and \*\* $p < 0.01$ ; one-way ANOVA/Bonferroni's multiple comparisons test (J).

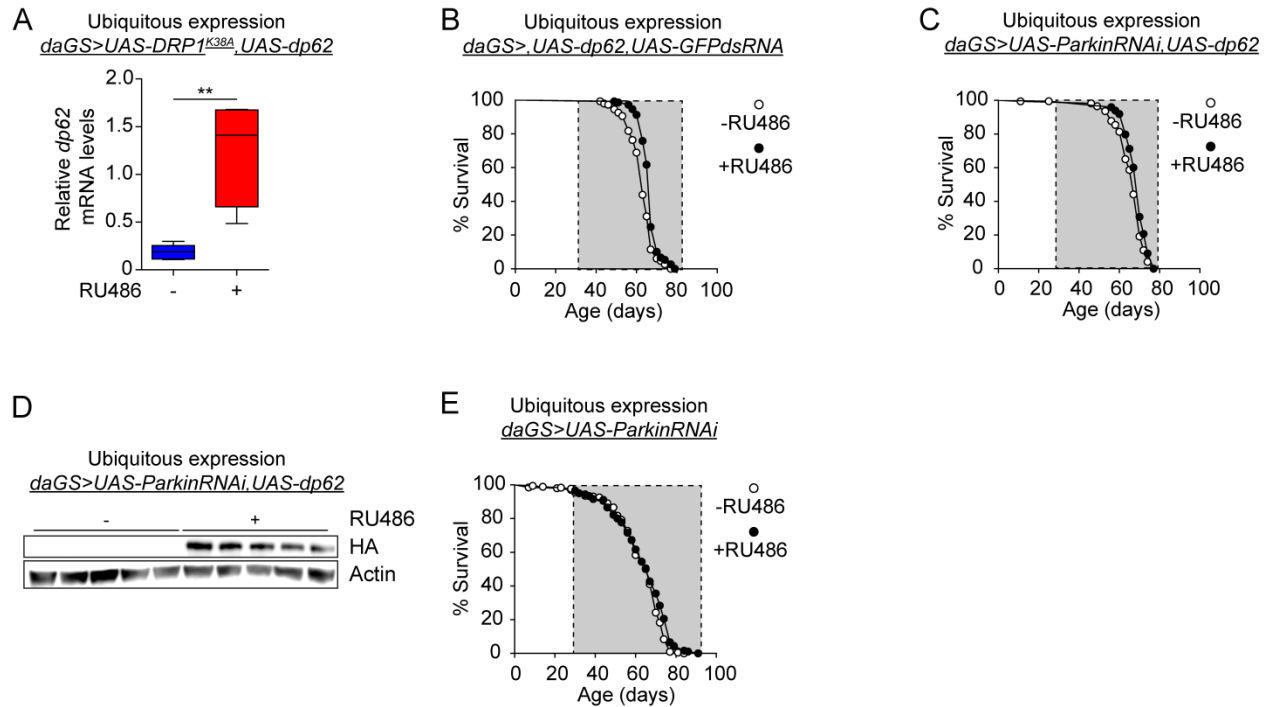

**Figure S7, related to Figure 6. qPCR analyses of *dp62* mRNA levels and RU486 treatment-control experiments for lifespan analyses.**

(A) qPCR analyses of *dp62* mRNA levels on day 37 in *daGS>UAS-dp62, UAS-DRP1<sup>K38A</sup>* females with and without RU486 mediated transgene induction for 7 days (day 30 to day 37).  $n=5$  biological replicates with 3 flies per replicate;  $**p < 0.01$ ; Unpaired t-test.

(B) Survival curves of *daGS>UAS-dp62, UAS-GFPdsRNA* females with or without RU486-mediated transgene induction from day 30 onwards. The shaded area indicates the duration of *dp62* and *GFP-dsRNA* induction.  $p < 0.0001$ , log-rank test;  $n > 145$  flies.

(C) Survival curves of *daGS>UAS-dp62, UAS-ParkinRNAi* females with or without RU486-mediated transgene induction from day 30 onwards. The shaded area indicates the duration of *dp62* and *ParkinRNAi* induction.  $p = 0.0003$ , log-rank test;  $n > 170$  flies.

(D) Western blot detection of HA levels in day 37 *daGS>UAS-ParkinRNAi, UAS-dp62HA* females with or without RU486-mediated transgene induction for 7 days (day 30 to day 37).

(E) Survival curves of *daGS>UAS-ParkinRNAi* females with or without RU486-mediated transgene induction from day 30 onwards. The shaded area indicates the duration of *ParkinRNAi* induction.  $p = 0.0147$ , log-rank test;  $n > 180$  flies.

RU486 was provided in the media at a concentration of 25  $\mu\text{g/ml}$ .
